# Supplementary material for: Facile synthesis of sulfonyl amidines via carbon–nitrogen bond formation mediated by FeCl3
Source: Royal Society of Chemistry journal article supplement (doi:10.1039/b910009a), 2009-01-01

## Supporting Information

### **Facile synthesis of sulfonyl amidines via carbon-nitrogen bonds formation mediated by FeCl<sub>3</sub>**

*Sujing Wang, Zhiyong Wang\* and Xiaoqi Zheng\**

To whom correspondence should be addressed. E-mail: [zwang3@ustc.edu.cn](mailto:zwang3@ustc.edu.cn). Fax:  
+86-551-3603185; Tel: +86-551-3603185

*Hefei National Laboratory for Physical Science at Microscale, Joint-lab of Green  
Synthetic Chemistry and Department of Chemistry, University of Science and  
Technology of China, Hefei 230026, P. R. China*

## 1. Representative procedure for the FeCl<sub>3</sub>-mediated synthesis of sulfonyl amidines

To a solution of sulfonyl azide (1.0 mmol) and tertiaryamine (4.0 mmol) in 5.0 mL of CH<sub>2</sub>Cl<sub>2</sub> was added FeCl<sub>3</sub> (1.0 mmol), and the resulting mixture was reacted under required condition monitored by TLC. Then the system was diluted with 10 mL CH<sub>2</sub>Cl<sub>2</sub>, following the addition of the EDTA-NaOH solution (20 mmol of EDTA and 20 mmol of NaOH in 15 mL of water). Afterward, the whole mixture was refluxed for five hours and the organic layer was separated. The aqueous layer was extracted with CH<sub>2</sub>Cl<sub>2</sub> (10 mL×3) and the combined organic phase was dried over anhydrous Na<sub>2</sub>SO<sub>4</sub> powder. The final product was obtained through purification with column chromatography.

## 2. Crystal data of the product obtained by 4-NO<sub>2</sub>-C<sub>6</sub>H<sub>4</sub>SO<sub>2</sub>N<sub>3</sub> reacted with Et<sub>3</sub>N.

The data collection for the above compound were performed on a Oxford Diffraction Gemini S Ultra CCD diffractometer equipped with mirror CuK $\alpha$  ( $\lambda = 1.54184 \text{ \AA}$ ) radiation at room temperature. The structure was solved by direct methods and refined by full-matrix least-squares methods with SHELXL-97 programs. Crystallographic parameters: C<sub>11</sub>H<sub>15</sub>N<sub>3</sub>O<sub>4</sub>S,  $M = 285.32$ , triclinic, space group P-1,  $a = 6.366(5)$ ,  $b = 10.293(5)$ ,  $c = 12.008(5) \text{ \AA}$ ,  $\alpha = 115.154(5)^\circ$ ,  $\beta = 102.366(5)^\circ$ ,  $\gamma = 92.033(5)^\circ$ ,  $V = 688.5(7) \text{ \AA}^3$ ,  $Z = 2$ ,  $D_c = 1.376 \text{ g/cm}^3$ ,  $F(000) = 300$ , a total of 5886 reflections, of which 2137 were independent ( $R_{\text{int}} = 0.015$ ). Goodness of fit: 1.065,  $R_1[I > 2\sigma(I)] = 0.0346$ ,  $wR_2[I > 2\sigma(I)] = 0.0984$ ,  $R_1(\text{all data}) = 0.0369$ ,  $wR_2(\text{all data}) = 0.1001$ , residuals ( $e \cdot \text{\AA}^{-3}$ ): 0.166, -0.226. CCDC depository number: 733386.

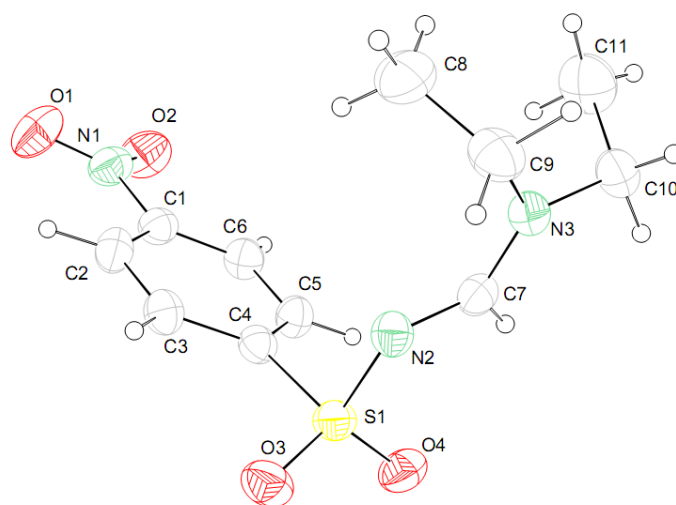

Figure S1 ORTEP draw of the crystal structure of the product obtained by 4-NO<sub>2</sub>-C<sub>6</sub>H<sub>4</sub>SO<sub>2</sub>N<sub>3</sub> reacted with Et<sub>3</sub>N with 30% thermal possibility.

### 3. Experimental details for the captures of enamine and diazoalkane.

3.1 Procedure for the capture of vinyl-diethylamine by (2,4-dinitrophenyl)hydrazine: To a mixture of FeCl<sub>3</sub> (810 mg, 5.0 mmol) and CH<sub>2</sub>Cl<sub>2</sub> (10 mL) was added CH<sub>2</sub>Cl<sub>2</sub> (5.0 mL) solution of triethylamine (1.2 g, 12.0 mmol) dropwise in 5 minutes. The resulting mixture was stirred for 20 minutes at room temperature. Afterward, the mixture was treated with 10 mL of saturated NH<sub>4</sub>Cl and (2,4-dinitrophenyl)hydrazine (198 mg, 1.0 mmol) solution (5 mL of EtOH and 5 mL of concentrated H<sub>2</sub>SO<sub>4</sub>), then extracted with ethyl acetate (3×20 mL), washed with water and brine, dried with anhydrous Na<sub>2</sub>SO<sub>4</sub> powder. The final product was obtained as the mixture of the desired product with an unconfirmed compound and determined by GC-MS, <sup>1</sup>H NMR and <sup>13</sup>C NMR.

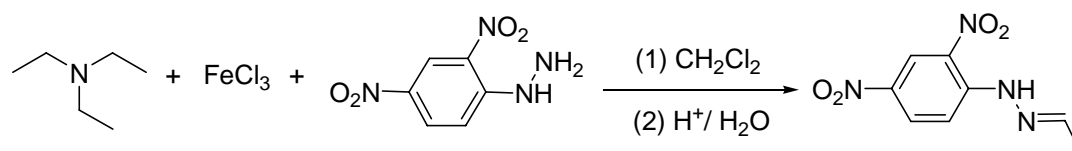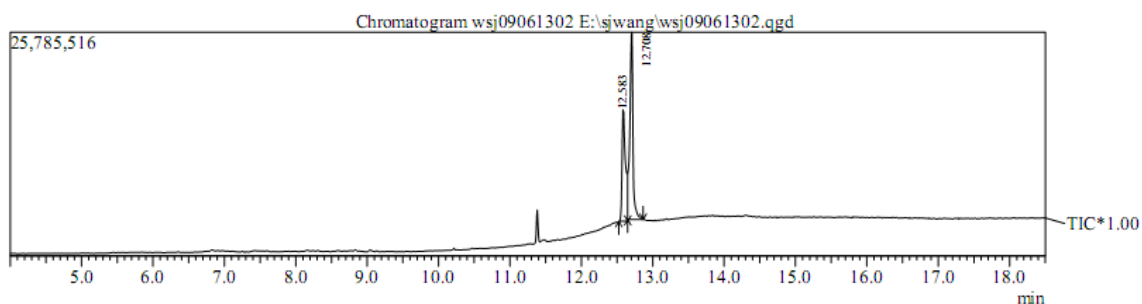

| Peak# | R.Time | I.Time | F.Time | Area      | Area%  | Peak Report TIC | Height | Height% | A/H | Mark | Name |
|-------|--------|--------|--------|-----------|--------|-----------------|--------|---------|-----|------|------|
| 1     | 12.583 | 12.525 | 12.650 | 45369418  | 39.74  | 12862942        | 37.35  | 3.53    | MI  |      |      |
| 2     | 12.708 | 12.650 | 12.867 | 68806887  | 60.26  | 21577437        | 62.65  | 3.19    | MI  |      |      |
|       |        |        |        | 114176304 | 100.00 | 34440379        | 100.00 |         |     |      |      |

Spectrum

Line#:1 R.Time:12.6(Scan#:1031)  
MassPeaks:187 BasePeak:79(1056641)  
RawMode:Averaged 12.6-12.6(1030-1032)  
BG Mode:Calc. from Peak

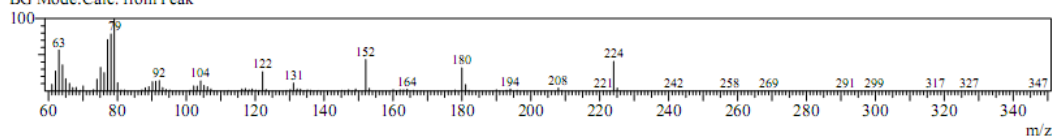

Line#:2 R.Time:12.7(Scan#:1046)  
MassPeaks:193 BasePeak:79(1894075)  
RawMode:Averaged 12.7-12.7(1045-1047)  
BG Mode:Calc. from Peak

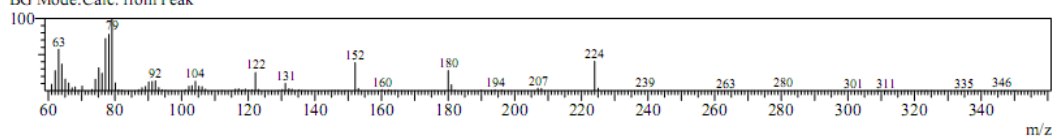

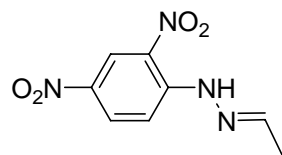

$^1\text{H}$  NMR ( $\text{CDCl}_3$ , 300 MHz, ppm):  $\delta = 11.02$  (s, 1 H), 9.06 (s, 1 H), 8.27 (d,  $J = 10.2$  Hz, 1 H), 7.91 (d,  $J = 9.0$  Hz, 1H), 7.62-7.60 (m, 1 H), 2.15 (m, 3H).  $^{13}\text{C}$  NMR ( $\text{CDCl}_3$ , 75 MHz, ppm):  $\delta = 148.8, 145.9, 140.9, 129.9, 127.9, 123.4, 116.5, 18.6$ .

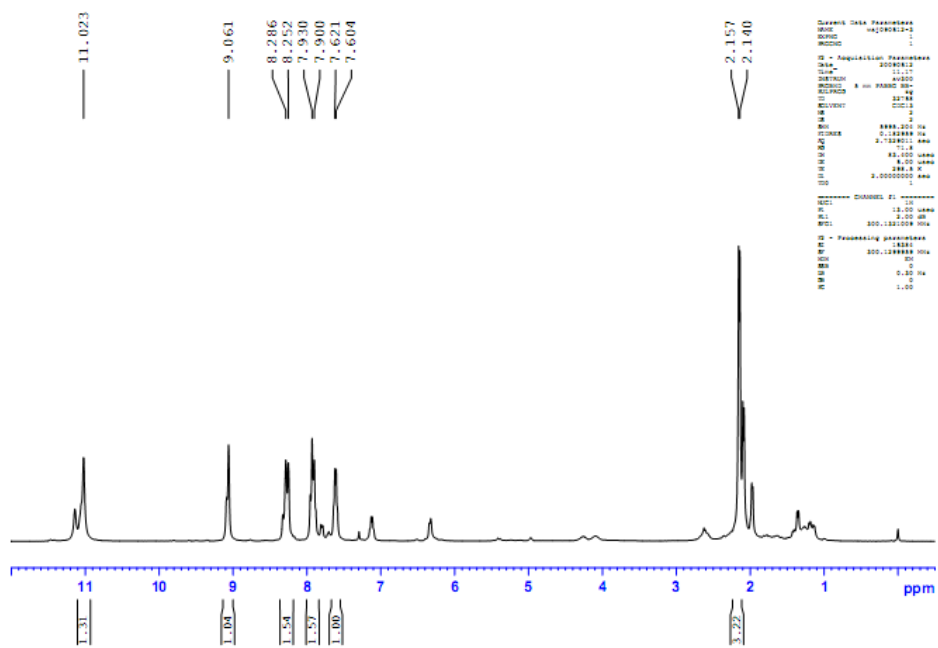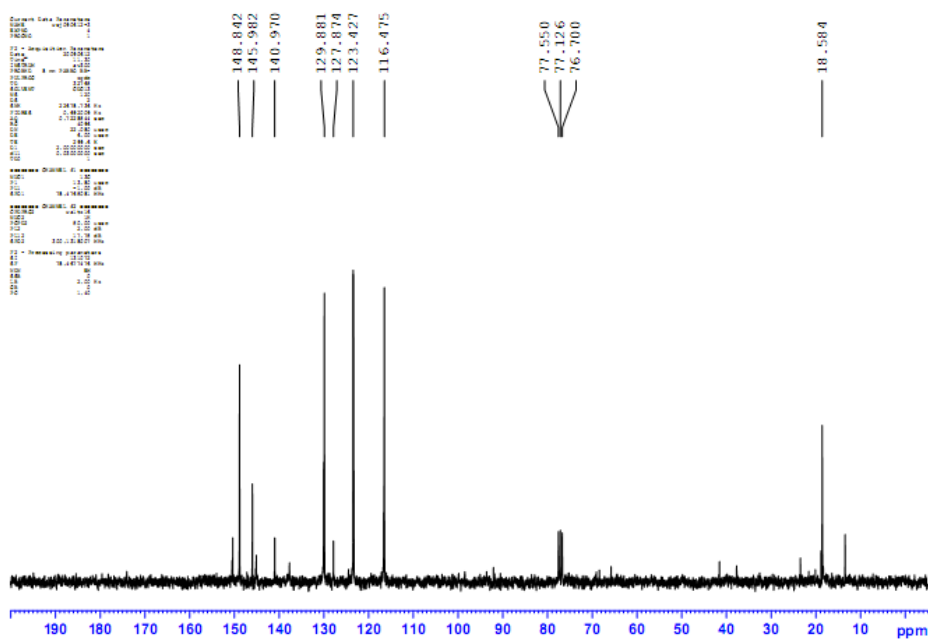

3.2 Procedure for the capture of diazomethane by benzoic acid: The experiment was carried out with the below equipments. To a  $\text{CH}_2\text{Cl}_2$  (10 mL) solution of  $\text{TsN}_3$  (985 mg, 5.0 mmol) and  $\text{FeCl}_3$  (810 mg, 5.0 mmol) was added triethylamine (2.0 g, 20 mmol) dropwisely. The generated gas was introduced into the  $\text{CHCl}_3$  (10 mL) solution of  $\text{PhCOOH}$  (223 mg, 1.0 mmol). After the reaction of  $\text{TsN}_3$  and  $\text{Et}_3\text{N}$  completed, the chloroform solution was treated with  $\text{NaOH}$  solution. The aqueous solution was extracted with chloroform and the combined organic phase was dried with anhydrous  $\text{Na}_2\text{SO}_4$  powder. The product of  $\text{PhCOOMe}$  was obtained and determined by GC-MS,  $^1\text{H}$  NMR and  $^{13}\text{C}$  NMR.

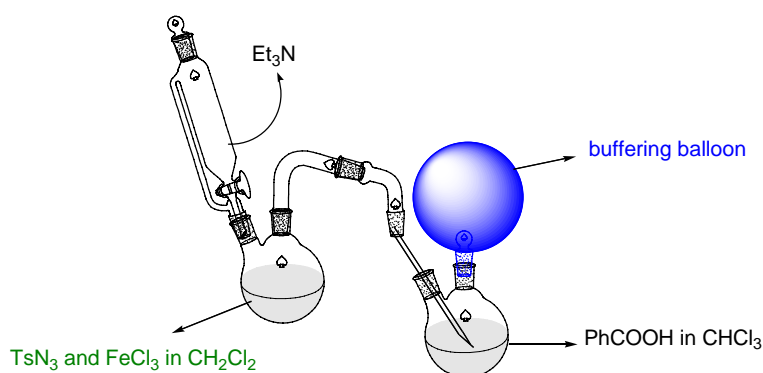

Figure S2 The equipment for the capture of diazomethane by benzoic acid.

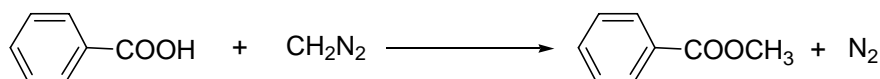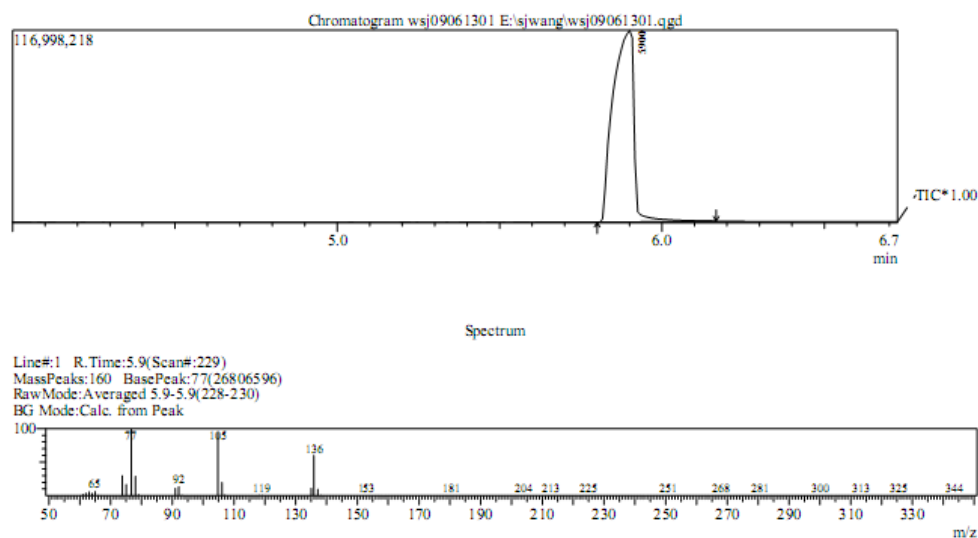

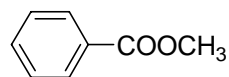

$^1\text{H}$  NMR ( $\text{CDCl}_3$ , 300 MHz, ppm):  $\delta = 8.03$  (m, 2 H), 7.52 (m, 1 H), 7.42 (m, 2 H), 3.91 (s, 3H).  $^{13}\text{C}$  NMR ( $\text{CDCl}_3$ , 75 MHz, ppm):  $\delta = 166.8, 132.8, 130.1, 129.5, 128.3, 51.8$ .

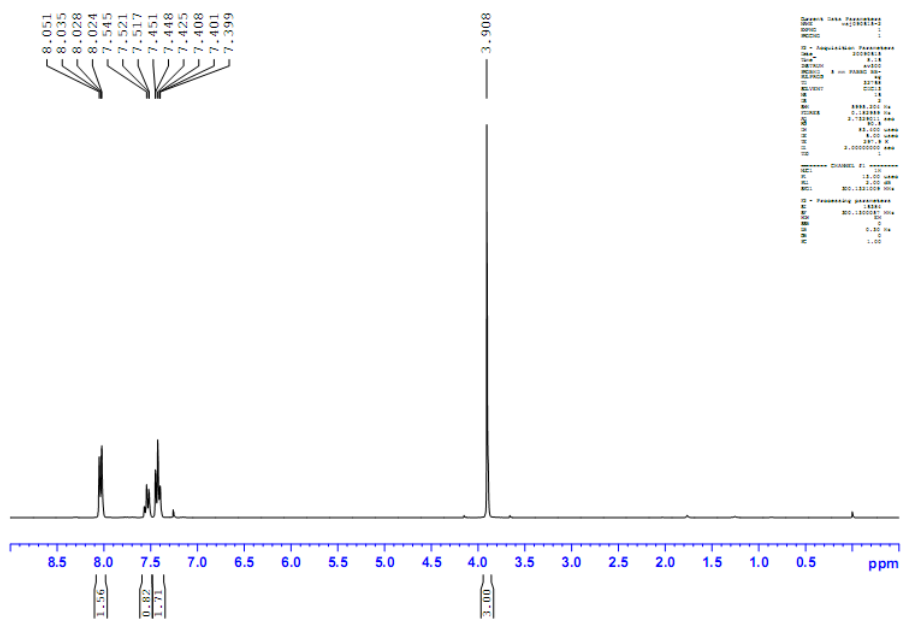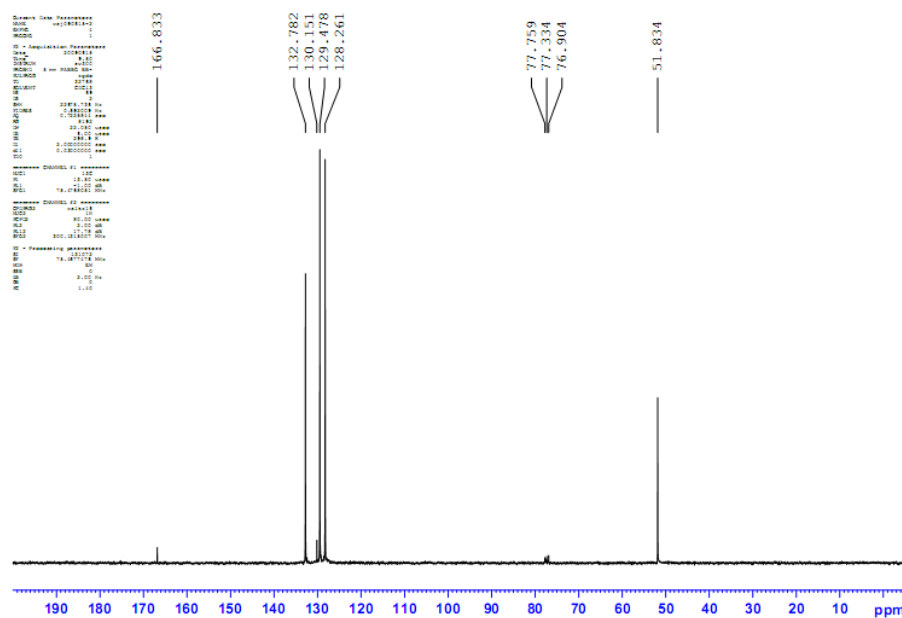

#### 4. Characterization data and NMR spectrums for products

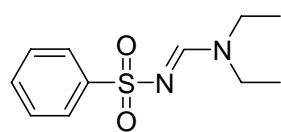

*(E)*-*N,N*-diethyl-*N'*-(phenylsulfonyl)formimidamide

$^1\text{H}$  NMR ( $\text{CDCl}_3$ , 300 MHz, ppm):  $\delta$  = 8.16 (s, 1 H), 7.89-7.86 (m, 2 H), 7.42-7.50 (m, 3 H), 3.50-3.34 (m, 4 H), 1.26-1.21 (t, 3 H,  $J$  = 7.2 Hz), 1.15-1.10 (t, 3 H,  $J$  = 7.2 Hz).  $^{13}\text{C}$  NMR ( $\text{CDCl}_3$ , 75 MHz, ppm):  $\delta$  = 158.1, 142.6, 131.6, 128.6, 126.1, 47.0, 40.9, 14.3, 11.9. IR (liquid film,  $\text{cm}^{-1}$ ):  $\nu$  = 2979, 2939, 1612, 1447, 1345, 1299, 1210, 1149, 1089, 956, 876, 770, 723, 691, 607. HRMS calc.  $\text{C}_{11}\text{H}_{16}\text{N}_2\text{O}_2\text{S}$  ( $\text{M}^+$ ): 240.0932. Found: 240.0935.

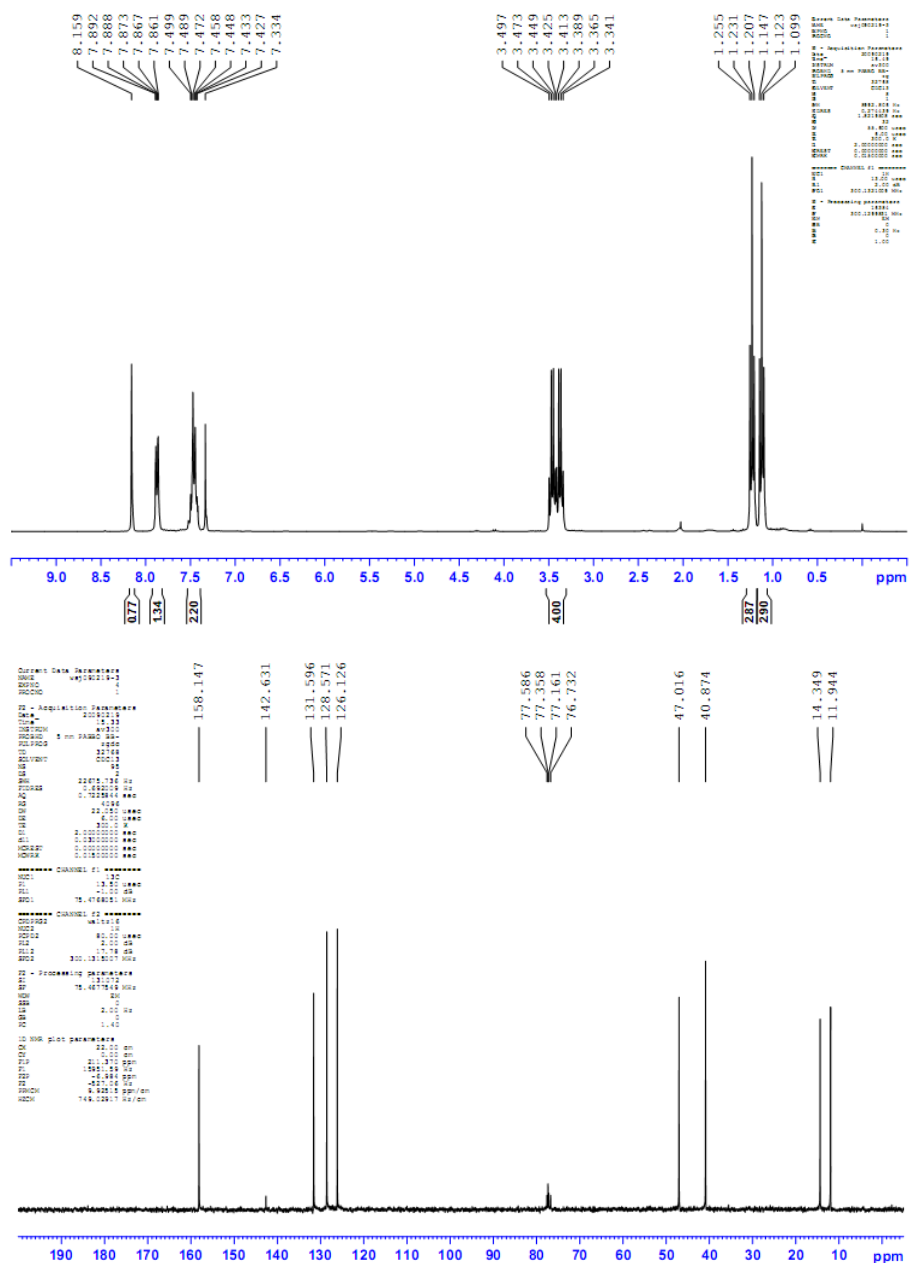

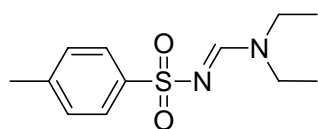

**(E)-N,N-diethyl-N'-tosylformimidamide**

$^1\text{H}$  NMR ( $\text{CDCl}_3$ , 300 MHz, ppm):  $\delta$  = 8.14 (s, 1 H), 7.75 (d, 2 H,  $J$  = 8.4 Hz), 7.24 (d, 2 H,  $J$  = 8.1 Hz), 3.49-3.34 (m, 4 H), 2.38 (s, 3 H), 1.25-1.21 (t, 3 H,  $J$  = 7.2 Hz), 1.12-1.08 (t, 3 H,  $J$  = 7.2 Hz).  $^{13}\text{C}$  NMR ( $\text{CDCl}_3$ , 75 MHz, ppm):  $\delta$  = 158.0, 142.0, 139.8, 129.1, 126.1, 46.9, 40.8, 21.3, 14.3, 11.9. IR (liquid film,  $\text{cm}^{-1}$ ):  $\nu$  = 2979, 2938, 1612, 1451, 1346, 1298, 1211, 1149, 1088, 955, 876, 818, 769, 674, 593, 553. HRMS calc.  $\text{C}_{12}\text{H}_{18}\text{N}_2\text{O}_2\text{S}$  ( $\text{M}^+$ ): 254.1089. Found: 254.1085.

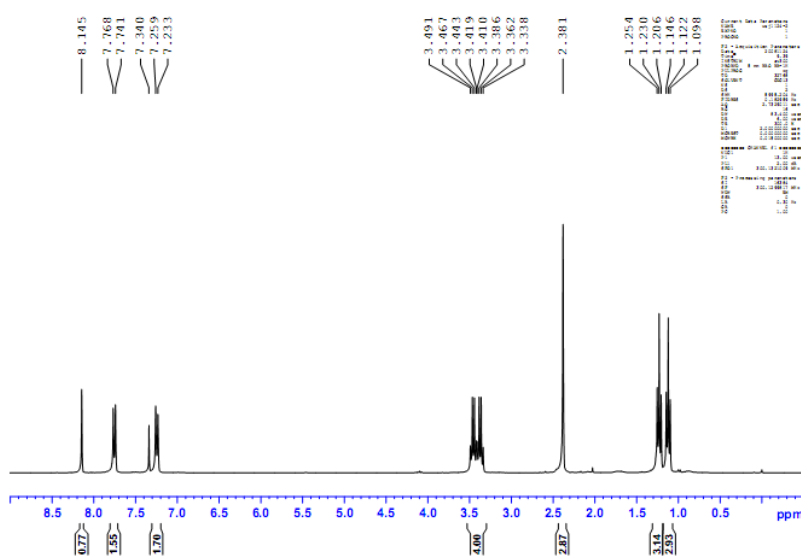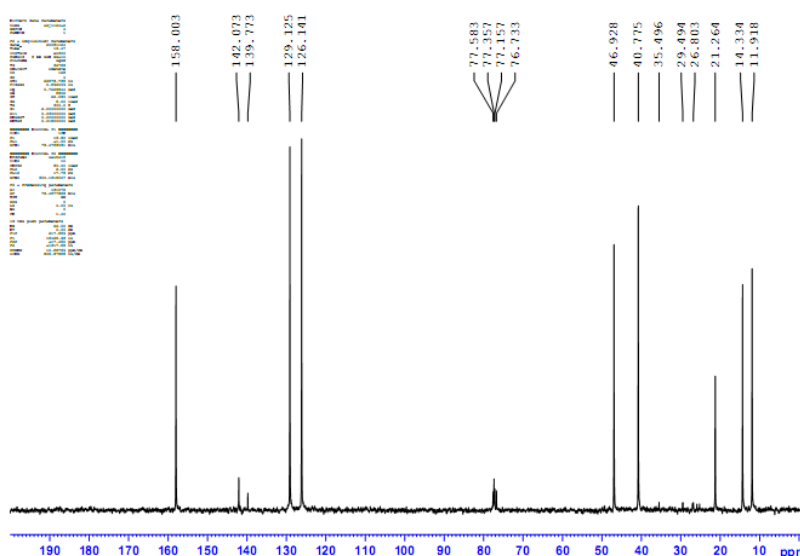



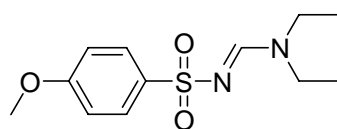

**(E)-N,N-diethyl-N'-(4-methoxyphenyl)sulfonylformimidamide**

$^1\text{H}$  NMR ( $\text{CDCl}_3$ , 300 MHz, ppm):  $\delta$  = 8.14 (s, 1 H), 7.79 (d, 2 H,  $J$  = 9.0 Hz), 6.93 (d, 2 H,  $J$  = 8.7 Hz), 3.79 (s, 3 H), 3.49-3.34 (m, 4 H), 1.25-1.20 (t, 3 H,  $J$  = 7.2 Hz), 1.14-1.09 (t, 3 H,  $J$  = 7.2 Hz).  $^{13}\text{C}$  NMR ( $\text{CDCl}_3$ , 75 MHz, ppm):  $\delta$  = 162.0, 157.8, 134.5, 128.1, 113.7, 55.4, 46.9, 40.7, 14.3, 11.9. IR (liquid film,  $\text{cm}^{-1}$ ):  $\nu$  = 2978, 2940, 1612, 1498, 1453, 1346, 1291, 1258, 1211, 1146, 1090, 1025, 955, 876, 835, 769, 677, 594, 573. HRMS calc.  $\text{C}_{12}\text{H}_{18}\text{N}_2\text{O}_3\text{S}$  ( $\text{M}^+$ ): 270.1038, Found: 270.1036.

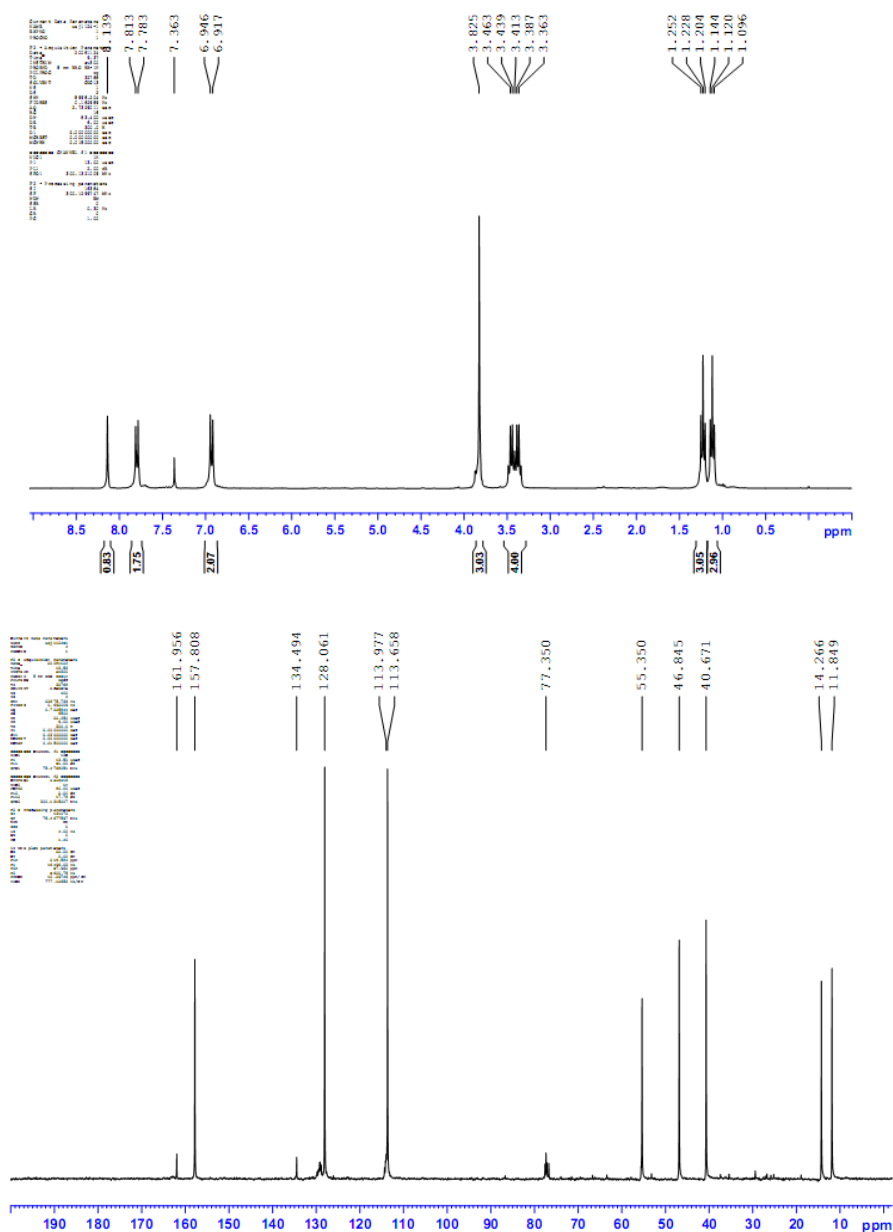

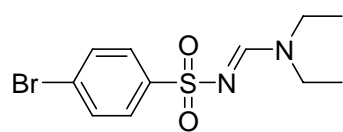

**(E)-N'-(4-bromophenylsulfonyl)-N,N-diethylformimidamide**

$^1\text{H}$  NMR ( $\text{CDCl}_3$ , 300 MHz, ppm):  $\delta$  = 8.15 (s, 1 H), 7.75 (d, 2 H,  $J$  = 8.7 Hz), 7.59 (d, 2 H,  $J$  = 8.4 Hz), 3.50-3.37 (m, 4 H), 1.28-1.23 (t, 3 H,  $J$  = 7.2 Hz), 1.16-1.11 (t, 3 H,  $J$  = 7.2 Hz).  $^{13}\text{C}$  NMR ( $\text{CDCl}_3$ , 75 MHz, ppm):  $\delta$  = 158.2, 141.8, 131.8, 127.9, 126.3, 47.1, 41.0, 14.4, 12.0. IR (liquid film,  $\text{cm}^{-1}$ ):  $\nu$  = 2979, 1612, 1450, 1344, 1303, 1210, 1148, 1086, 1010, 956, 878, 820, 771, 740, 623, 587. HRMS calc.  $\text{C}_{11}\text{H}_{15}\text{BrN}_2\text{O}_2\text{S}$  ( $\text{M}^+$ ): 318.0038. Found: 318.0032.

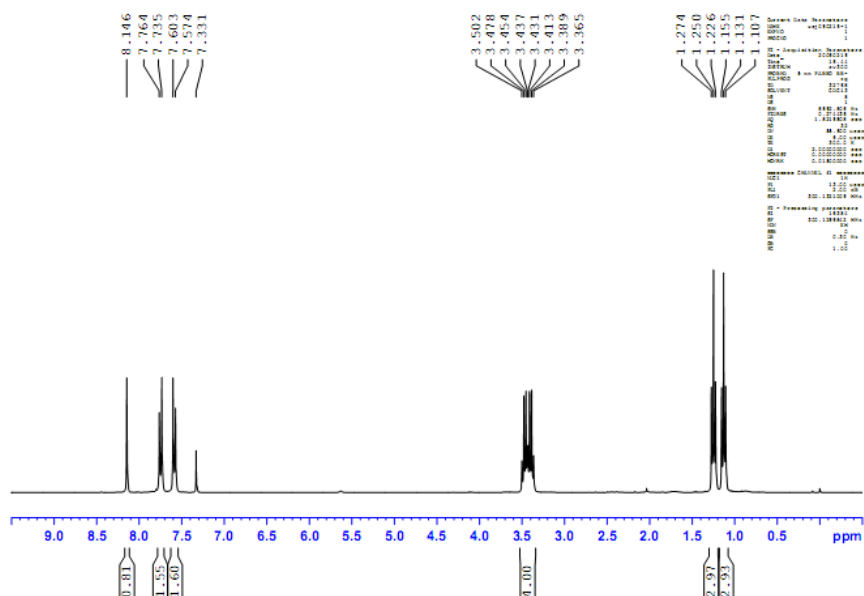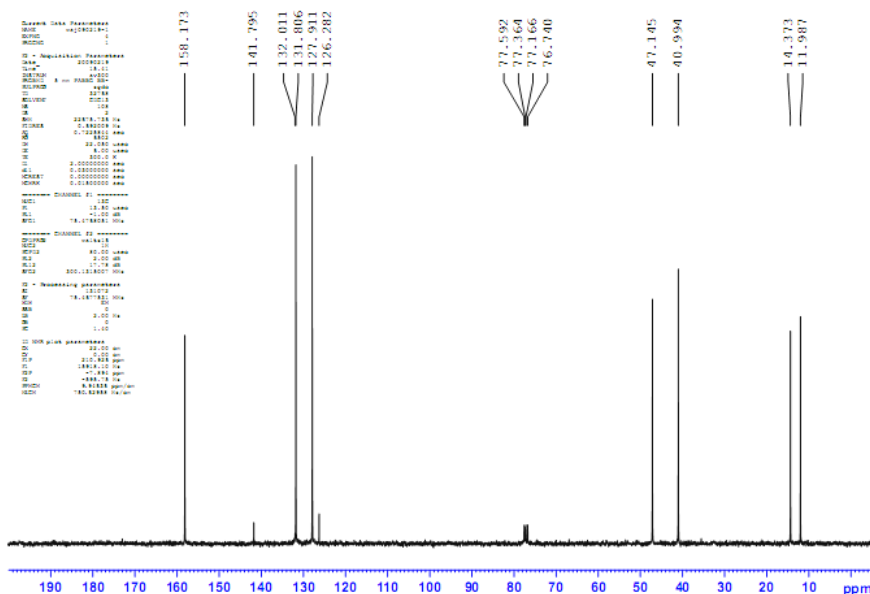

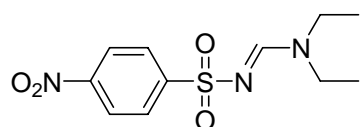

**(E)-N,N-diethyl-N'-(4-nitrophenylsulfonyl)formimidamide**

$^1\text{H}$  NMR ( $\text{CDCl}_3$ , 300 MHz, ppm):  $\delta$  = 8.30 (d, 2 H,  $J$  = 9.0 Hz), 8.17 (s, 1 H), 8.07 (d, 2 H,  $J$  = 9.0 Hz), 3.54-3.40 (m, 4 H), 1.32-1.27 (t, 3 H,  $J$  = 7.2 Hz), 1.19-1.14 (t, 3 H,  $J$  = 7.2 Hz).  $^{13}\text{C}$  NMR ( $\text{CDCl}_3$ , 75 MHz, ppm):  $\delta$  = 158.4, 149.5, 148.5, 127.7, 124.1, 47.4, 41.3, 14.4, 12.0. IR (liquid film,  $\text{cm}^{-1}$ ):  $\nu$  = 2979, 1614, 1528, 1347, 1296, 1209, 1151, 1086, 957, 881, 854, 771, 738, 631, 587. HRMS calc.  $\text{C}_{11}\text{H}_{15}\text{N}_3\text{O}_4\text{S}$  ( $\text{M}^+$ ): 285.0783. Found: 285.0785.

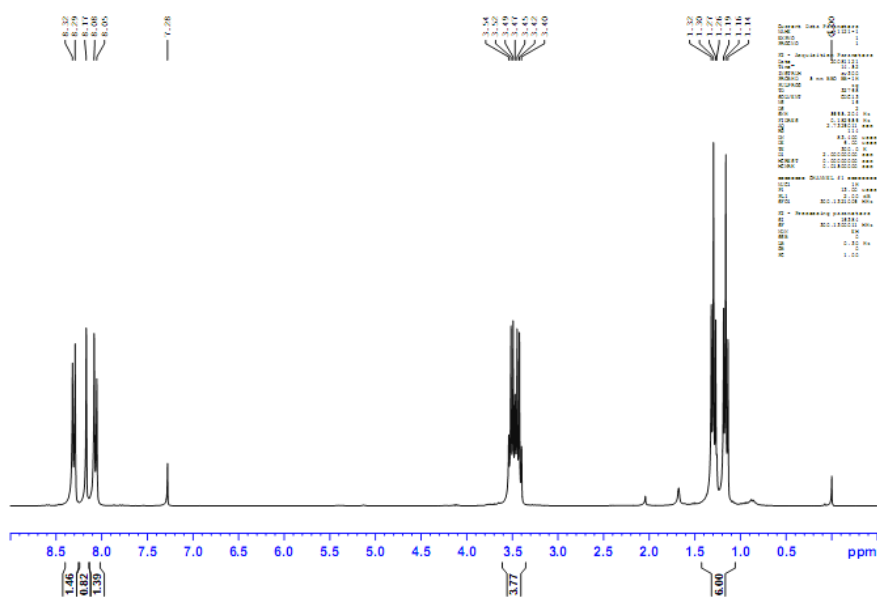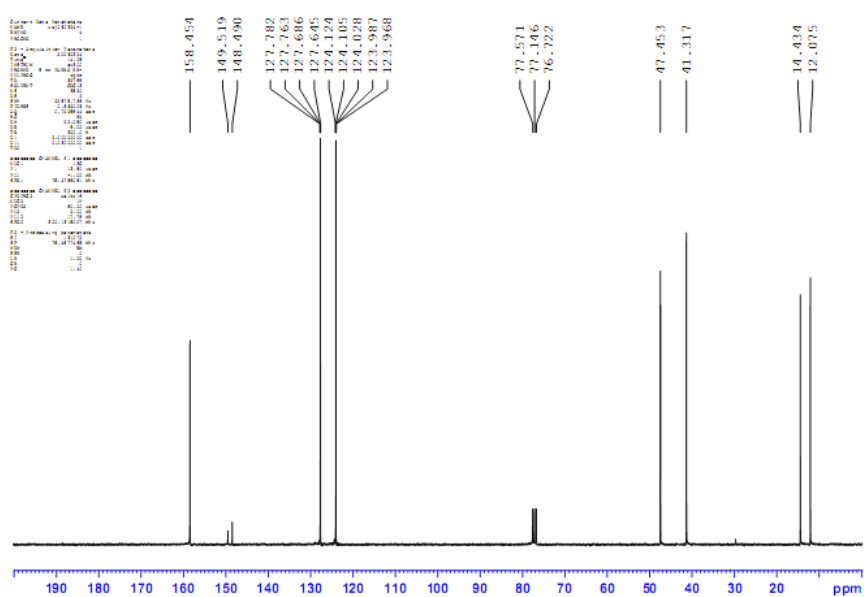

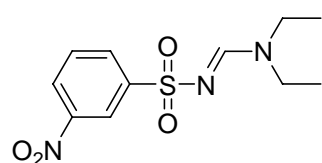

**(E)-N,N-diethyl-N'-(3-nitrophenylsulfonyl)formimidamide**

$^1\text{H}$  NMR ( $\text{CDCl}_3$ , 300 MHz, ppm):  $\delta$  = 8.70 (s, 1 H), 8.36 (d, 1 H,  $J$  = 7.5 Hz), 8.23 (m, 2 H), 7.75-7.69 (m, 1 H), 3.56-3.44 (m, 4 H), 1.33-1.29 (t, 3 H,  $J$  = 7.2 Hz), 1.20-1.15 (t, 3 H,  $J$  = 7.2 Hz).  $^{13}\text{C}$  NMR ( $\text{CDCl}_3$ , 75 MHz, ppm):  $\delta$  = 158.4, 147.9, 144.8, 132.1, 130.1, 126.2, 121.5, 47.4, 41.2, 14.3, 12.0. IR (liquid film,  $\text{cm}^{-1}$ ):  $\nu$  = 2981, 1618, 1532, 1450, 1353, 1299, 1209, 1157, 1119, 1069, 1000, 958, 888, 819, 773, 735, 665, 611, 587. HRMS calc.  $\text{C}_{11}\text{H}_{15}\text{N}_3\text{O}_4\text{S}(\text{M}^+)$ : 285.0783. Found: 285.0789.

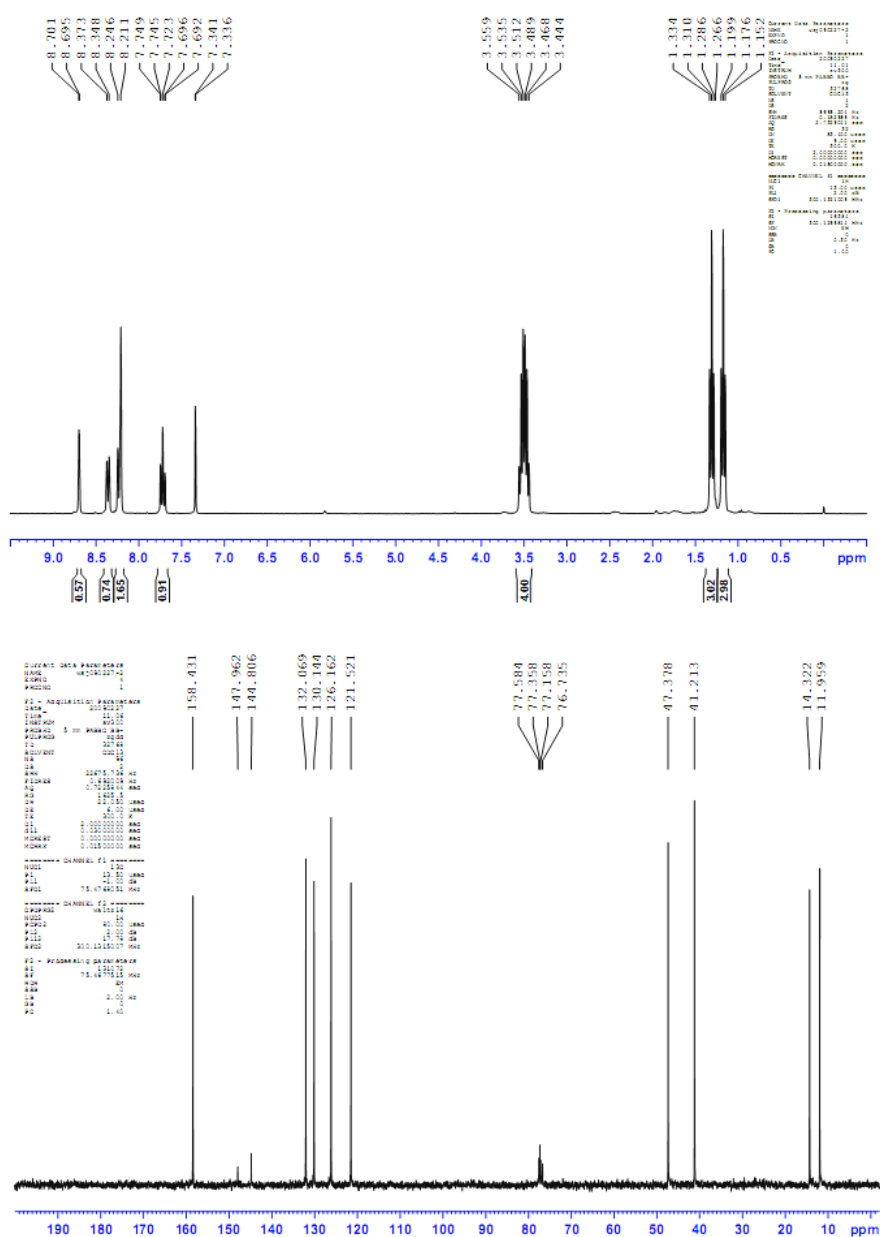

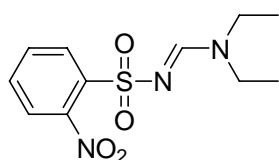

**(E)-N,N-diethyl-N'-(2-nitrophenylsulfonyl)formimidamide**

$^1\text{H}$  NMR ( $\text{CDCl}_3$ , 300 MHz, ppm):  $\delta$  = 8.26-8.23 (m, 1 H), 8.09 (s, 1 H), 7.72-7.64(m, 3 H), 3.52-3.43 (m, 4 H), 1.35-1.30 (t, 3 H,  $J$  = 7.2 Hz), 1.18-1.14 (t, 3 H,  $J$  = 7.2 Hz).  $^{13}\text{C}$  NMR ( $\text{CDCl}_3$ , 75 MHz, ppm):  $\delta$  = 159.7, 147.7, 135.3, 132.8, 132.0, 130.5, 123.9, 47.4, 41.3, 14.3, 12.0. IR (liquid film,  $\text{cm}^{-1}$ ):  $\nu$  = 2981, 1618, 1541, 1449, 1344, 1310, 1209, 1155, 1122, 1059, 958, 882, 772, 742, 657, 608, 588. HRMS calc.  $\text{C}_{11}\text{H}_{15}\text{N}_3\text{O}_4\text{S}(\text{M}^+)$ : 285.0783. Found: 285.0780.

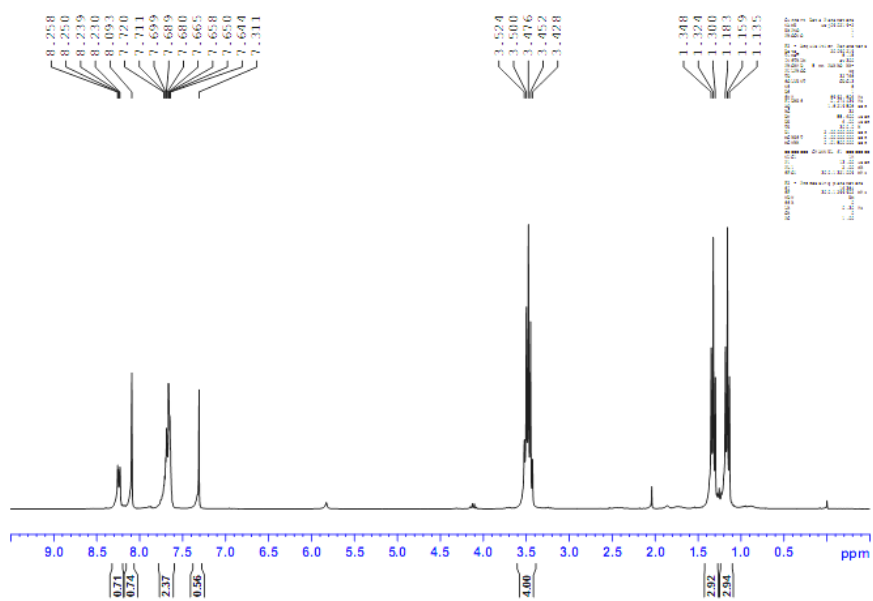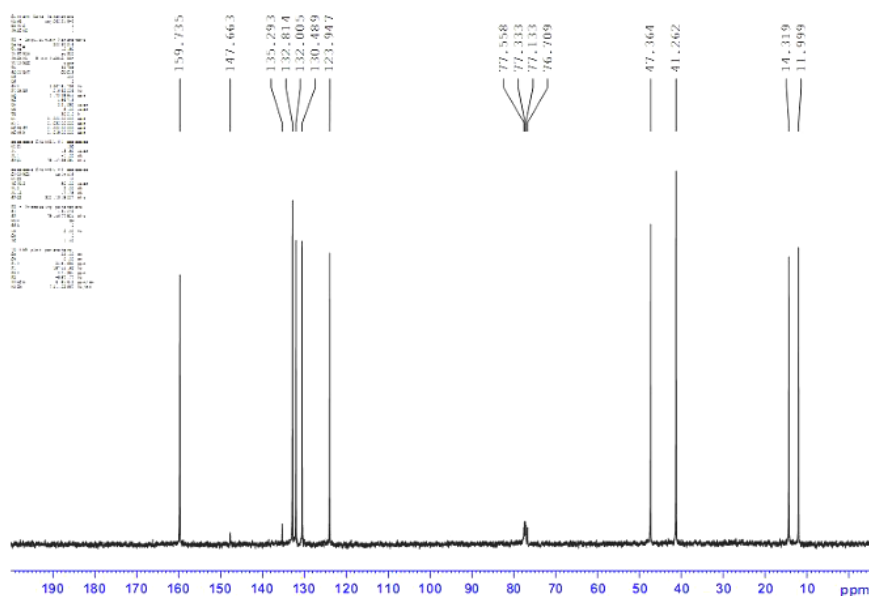

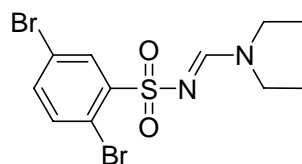

**(E)-N'-(2,5-dibromophenylsulfonyl)-N,N-diethylformimidamide**

$^1\text{H}$  NMR ( $\text{CDCl}_3$ , 300 MHz, ppm):  $\delta$  = 8.39 (m, 1 H), 8.29 (s, 1 H), 7.54-7.44(m, 2 H), 3.53-3.42 (m, 4 H), 1.33-1.28 (t, 3 H,  $J$  = 7.2 Hz), 1.19-1.14 (t, 3 H,  $J$  = 7.2 Hz).  $^{13}\text{C}$  NMR ( $\text{CDCl}_3$ , 75 MHz, ppm):  $\delta$  = 160.2, 142.5, 136.3, 135.9, 133.4, 121.5, 118.8, 47.4, 41.4, 14.7, 12.1. IR (liquid film,  $\text{cm}^{-1}$ ):  $\nu$  = 2978, 1614, 1445, 1344, 1303, 1209, 1154, 1129, 1085, 1023, 957, 881, 822, 766, 670, 611, 592. HRMS calc.  $\text{C}_{11}\text{H}_{14}\text{Br}_2\text{N}_2\text{O}_4\text{S}$  ( $\text{M}^+$ ): 397.9122. Found: 397.9127.

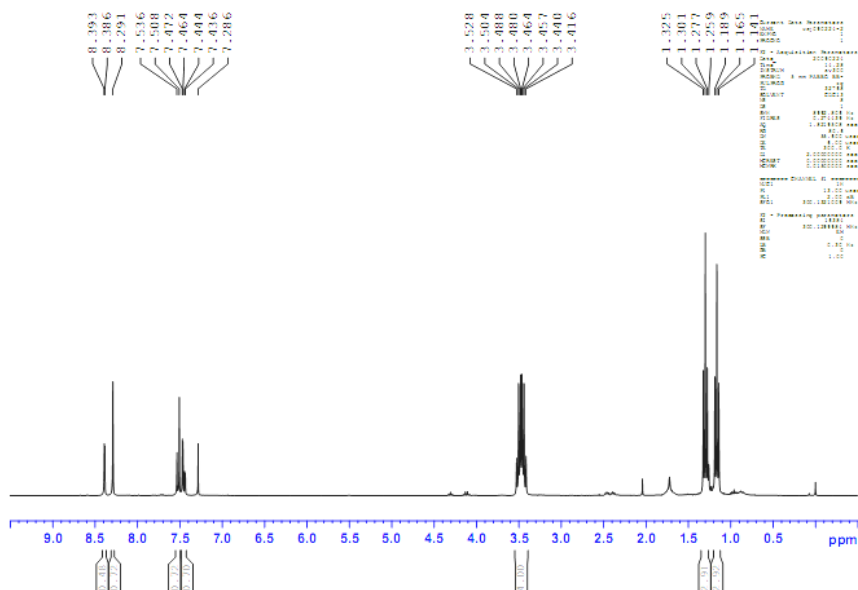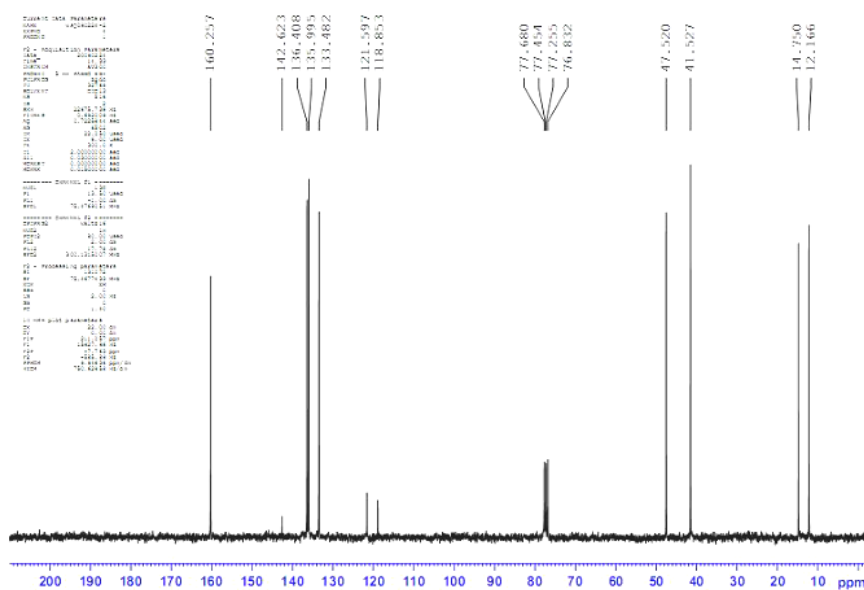

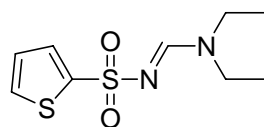

**(E)-N,N-diethyl-N'-(thiophen-2-ylsulfonyl)formimidamide**

$^1\text{H}$  NMR ( $\text{CDCl}_3$ , 300 MHz, ppm):  $\delta$  = 8.14 (s, 1 H), 7.57-7.56 (m, 1 H), 7.49 (m, 1 H), 7.00-7.04 (m, 1 H), 3.53-3.37 (m, 4 H), 1.28-1.26 (t, 3 H,  $J$  = 7.2 Hz), 1.19-1.15 (t, 3 H,  $J$  = 7.2 Hz).  $^{13}\text{C}$  NMR ( $\text{CDCl}_3$ , 75 MHz, ppm):  $\delta$  = 158.4, 144.4, 130.6, 130.3, 127.0, 47.4, 41.3, 14.5, 12.2. IR (liquid film,  $\text{cm}^{-1}$ ):  $\nu$  = 2979, 1616, 1449, 1341, 1301, 1224, 1209, 1146, 1089, 1014, 956, 879, 770, 727, 673, 610, 589. HRMS calc.  $\text{C}_9\text{H}_{14}\text{N}_2\text{O}_2\text{S}_2$  ( $\text{M}^+$ ): 246.0497. Found: 246.0499.

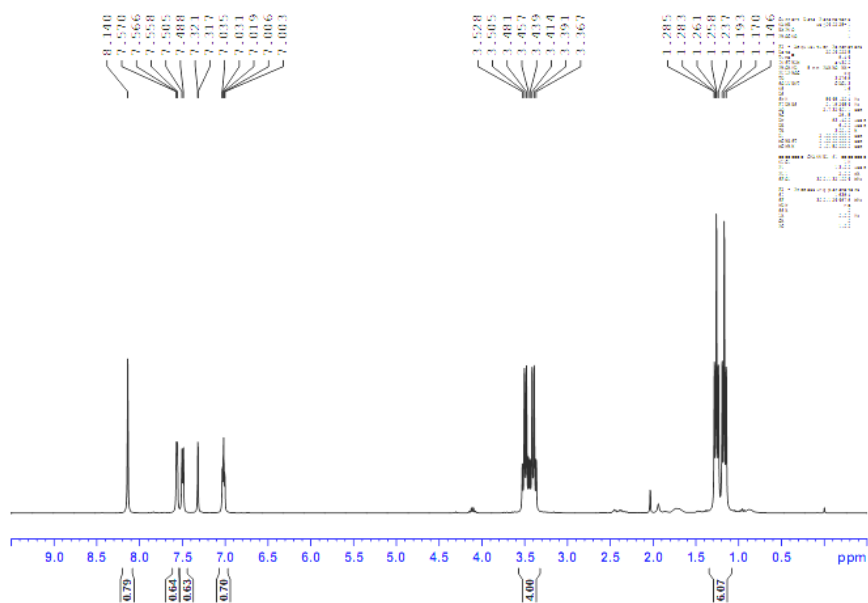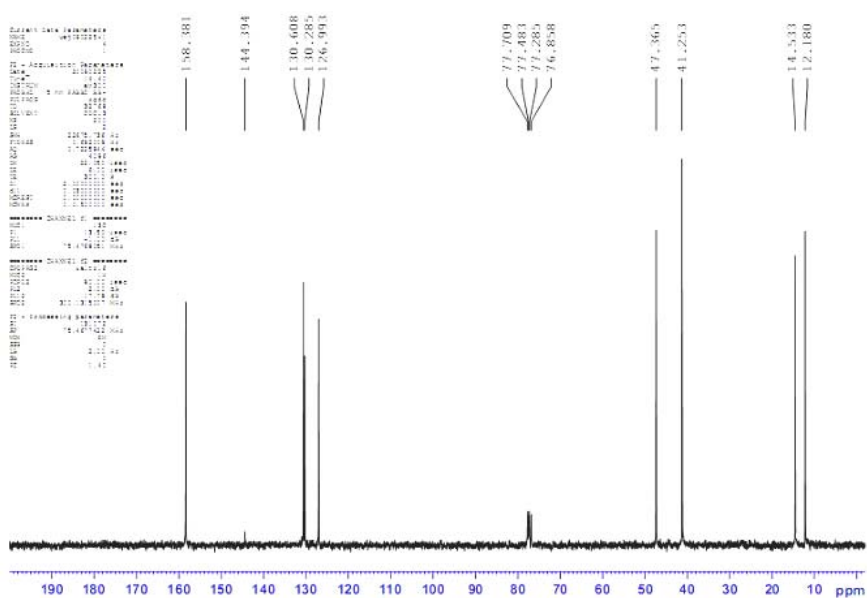

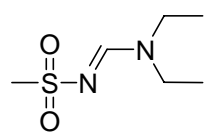

**(E)-N,N-diethyl-N'-(methylsulfonyl)formimidamide**

$^1\text{H}$  NMR ( $\text{CDCl}_3$ , 300 MHz, ppm):  $\delta$  = 8.07 (s, 1 H), 3.53-3.37 (m, 4 H), 2.94 (s, 3 H), 1.30-1.18 (m, 6 H).  $^{13}\text{C}$  NMR ( $\text{CDCl}_3$ , 75 MHz, ppm):  $\delta$  = 158.2, 47.0, 42.0, 40.9, 14.5, 12.0. IR (liquid film,  $\text{cm}^{-1}$ ):  $\nu$  = 2979, 1614, 1453, 1356, 1292, 1211, 1130, 968, 875, 823, 778, 577, 553, 527. HRMS calc.  $\text{C}_6\text{H}_{14}\text{N}_2\text{O}_2\text{S}(\text{M}^+)$ : 178.0776, Found: 178.0773.

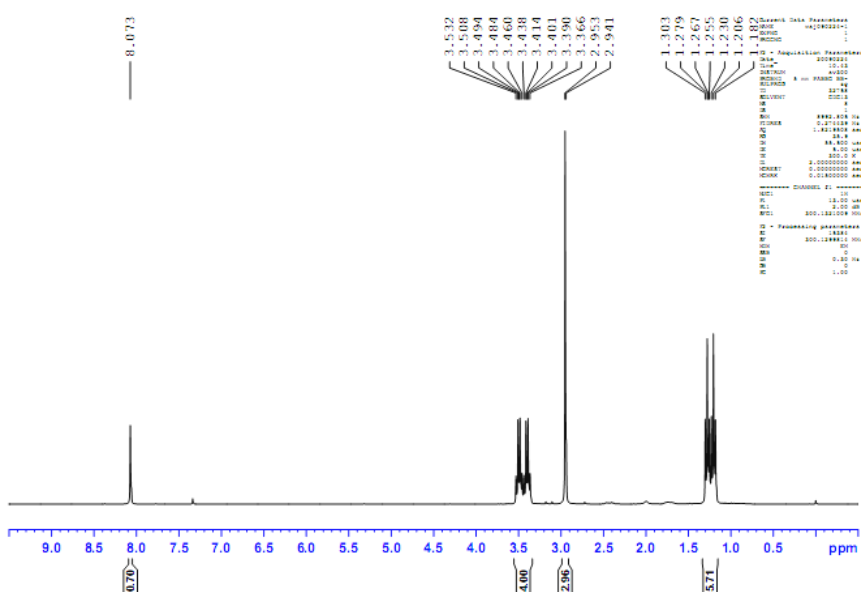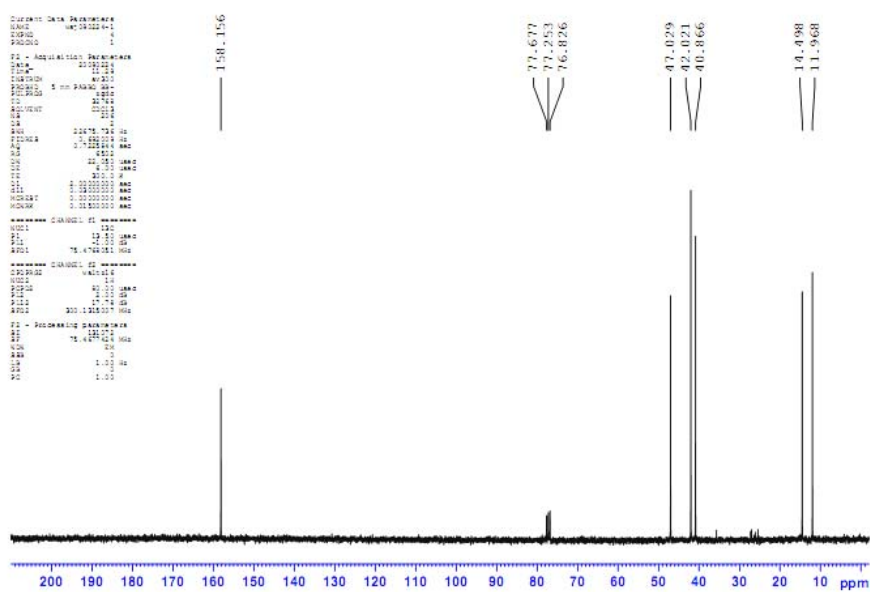



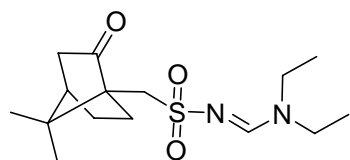

**(E)-N'-((7,7-dimethyl-2-oxobicyclo[2.2.1]heptan-1-yl)methylsulfonyl)-N,N-diethylformimidamide**  $^1\text{H}$  NMR ( $\text{CDCl}_3$ , 300

MHz, ppm):  $\delta$  = 8.04 (s, 1 H), 3.51-3.40 (m, 4 H), 3.21-1.43 (m, 9 H), 1.32-0.87 (m, 12 H).  $^{13}\text{C}$  NMR ( $\text{CDCl}_3$ , 75 MHz, ppm):  $\delta$  = 215.0, 158.7, 50.8, 46.9, 42.6, 42.5, 40.7, 35.8, 28.3, 26.9, 24.7, 19.9, 19.7, 14.5, 12.0. IR (liquid film,  $\text{cm}^{-1}$ ):  $\nu$  = 2965, 1744, 1614, 1454, 1345, 1304, 1213, 1169, 1129, 1053, 956, 873, 823, 765, 681, 615, 577, 530. HRMS calc.  $\text{C}_{15}\text{H}_{26}\text{N}_2\text{O}_3\text{S}$  ( $\text{M}^+$ ): 314.1664, Found: 314.1659.

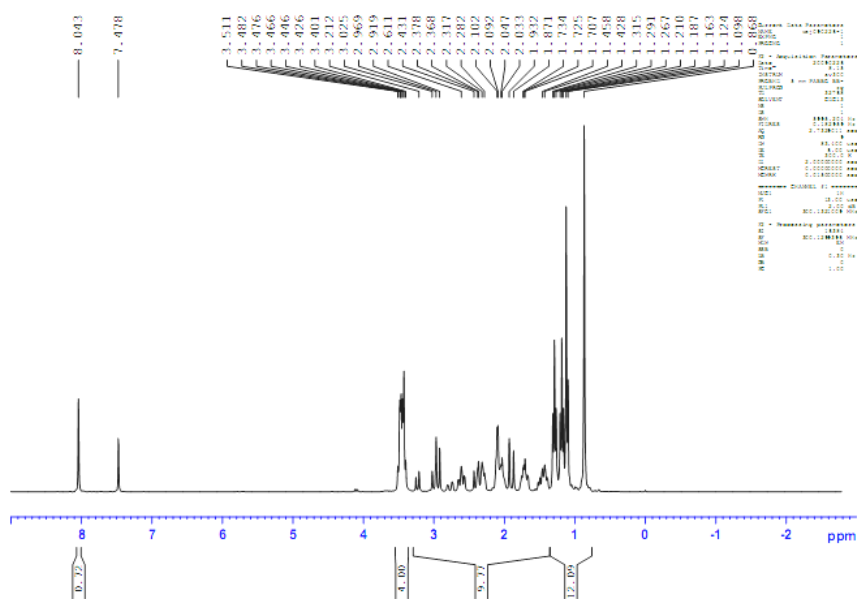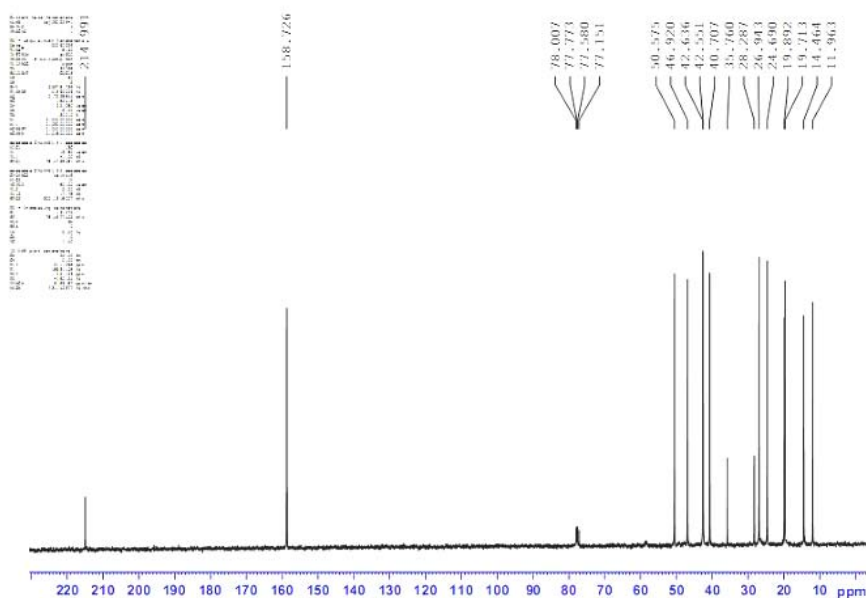

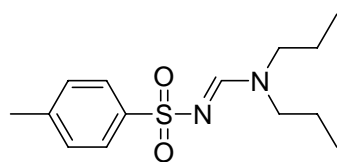

**(E)-N,N-dipropyl-N'-tosylformimidamide**

$^1\text{H}$  NMR ( $\text{CDCl}_3$ , 300 MHz, ppm):  $\delta$  = 8.15 (s, 1 H), 7.74 (d, 2 H,  $J$  = 8.1 Hz), 7.23 (d, 2 H,  $J$  = 7.8 Hz), 3.37-3.24 (m, 4 H), 2.38 (s, 3 H), 1.63-1.55 (m, 4 H), 0.91-0.82 (m, 6 H).  $^{13}\text{C}$  NMR ( $\text{CDCl}_3$ , 75 MHz, ppm):  $\delta$  = 159.1, 142.2, 140.0, 129.3, 126.3, 54.3, 47.9, 21.9, 21.5, 20.0, 11.2, 10.9. IR (liquid film,  $\text{cm}^{-1}$ ):  $\nu$  = 2966, 2935, 2876, 1609, 1544, 1454, 1344, 1298, 1148, 1088, 910, 878, 837, 815, 676, 554. HRMS calc.  $\text{C}_{14}\text{H}_{22}\text{N}_2\text{O}_2\text{S}$  ( $\text{M}^+$ ): 282.1402. Found: 282.1404.

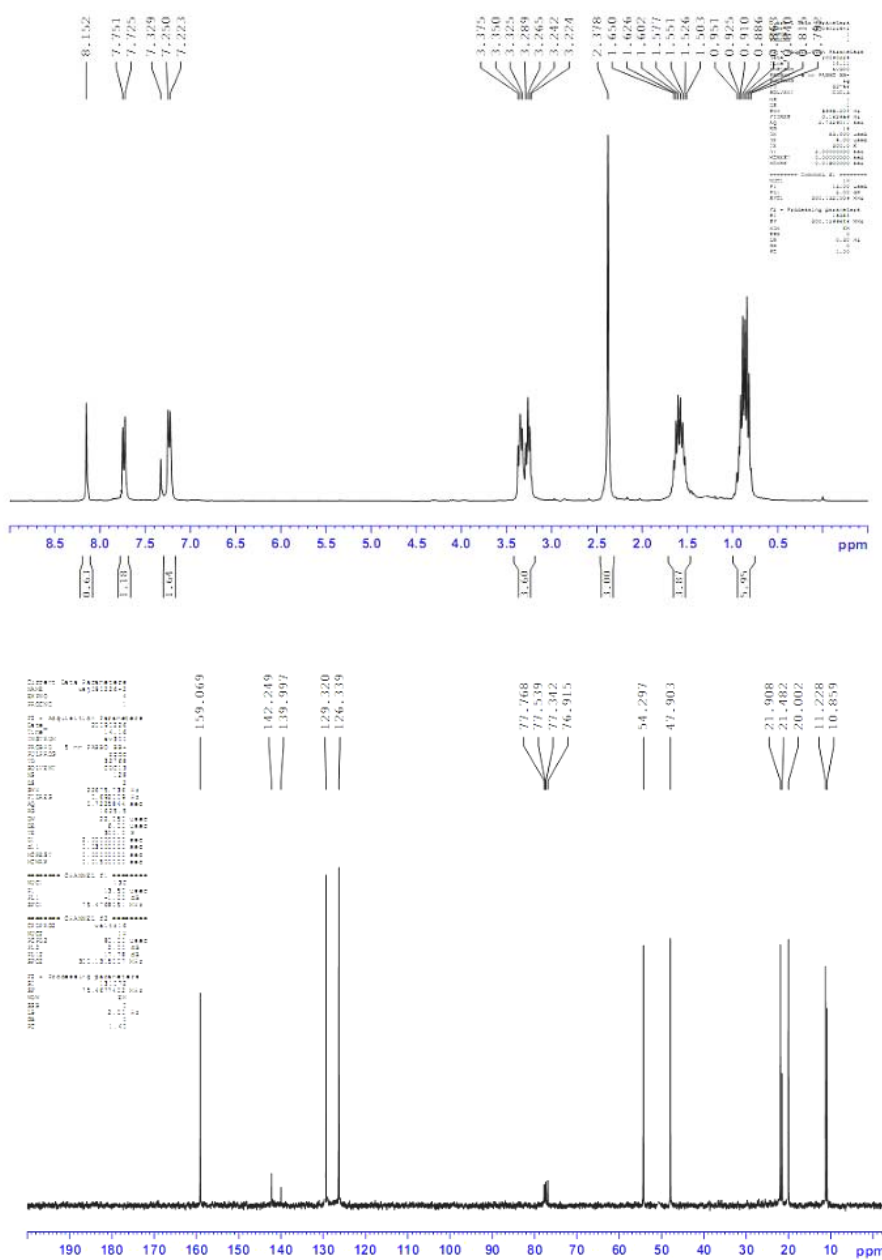

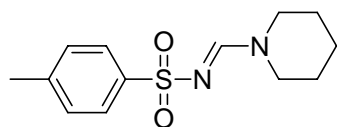

**(E)-4-methyl-N-(piperidin-1-ylmethylene)benzenesulfonamide**

$^1\text{H}$  NMR ( $\text{CDCl}_3$ , 300 MHz, ppm): 8.12 (s, 1H), 7.76 (d, 2 H,  $J = 8.4$  Hz), 7.25 (d, 2 H,  $J = 6.6$  Hz), 3.61-3.57 (m, 2 H), 3.42-3.39 (m, 2 H), 2.39 (s, 3 H), 1.67-1.57 (m, 6 H).  $^{13}\text{C}$  NMR ( $\text{CDCl}_3$ , 75 MHz, ppm):  $\delta = 157.7, 142.8, 140.0, 129.7, 126.8, 52.3, 45.1, 26.8, 25.2, 24.3, 21.9$ . IR (liquid film,  $\text{cm}^{-1}$ ):  $\nu = 2939, 2861, 1611, 1448, 1339, 1298, 1283, 1148, 1089, 927, 873, 851, 784, 675, 607, 562$ . HRMS calc.  $\text{C}_{13}\text{H}_{18}\text{N}_2\text{O}_2\text{S}$  ( $\text{M}^+$ ): 266.1089. Found: 266.1081.

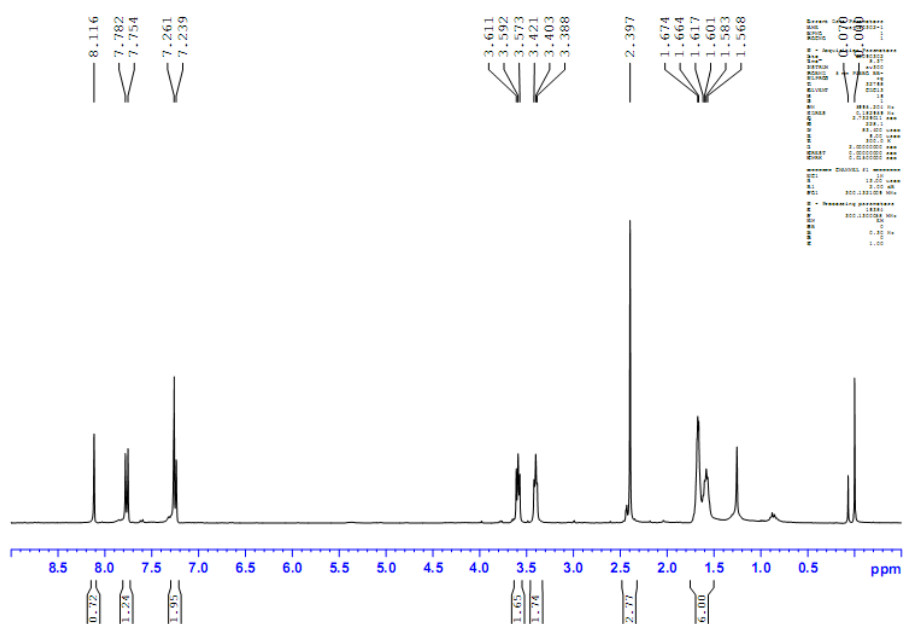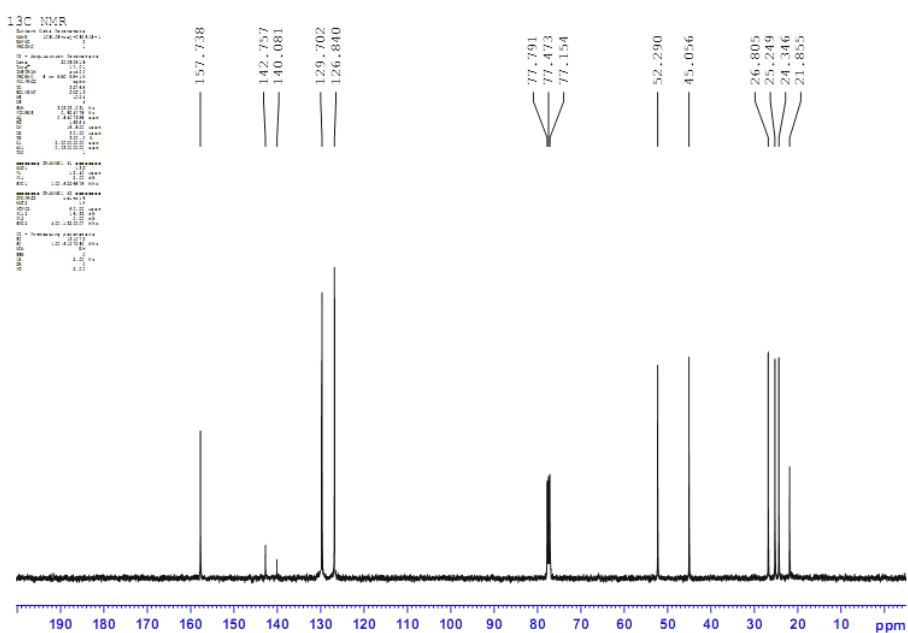

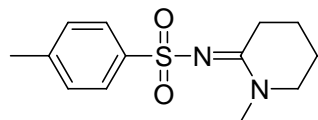

**4-methyl-N-(1-methylpiperidin-2-ylidene)benzenesulfonamide**

$^1\text{H}$  NMR ( $\text{CDCl}_3$ , 300 MHz, ppm): 7.82 (d, 2 H,  $J = 8.1$  Hz), 7.24 (d, 2 H,  $J = 8.1$  Hz), 3.37-3.33 (m, 2 H), 3.07-3.03 (m, 5 H), 2.39 (s, 3 H), 1.80-1.75 (m, 4 H).  $^{13}\text{C}$  NMR ( $\text{CDCl}_3$ , 75 MHz, ppm):  $\delta = 166.0$ , 141.7, 141.4, 129.1, 126.3, 50.8, 38.3, 28.6, 22.2, 21.4, 19.6. IR (liquid film,  $\text{cm}^{-1}$ ):  $\nu = 2951$ , 2870, 1571, 1483, 1404, 1364, 1327, 1273, 1143, 1090, 962, 823, 704, 675, 584, 554. HRMS calc.  $\text{C}_{13}\text{H}_{18}\text{N}_2\text{O}_2\text{S}$  ( $\text{M}^+$ ): 266.1089. Found: 266.1085.

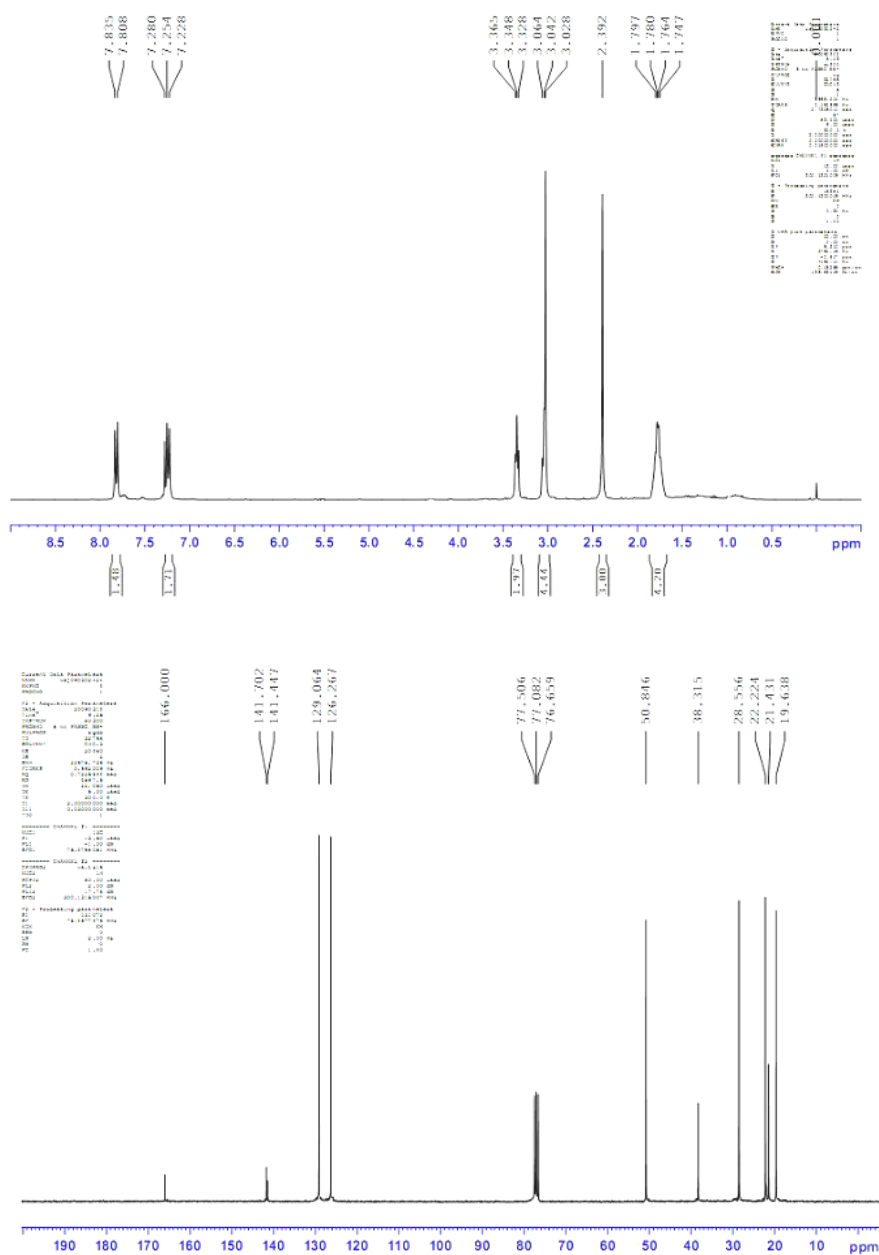

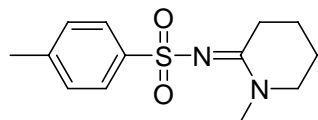

**N-(1-ethylpiperidin-2-ylidene)-4-methylbenzenesulfonamide**

$^1\text{H}$  NMR ( $\text{CDCl}_3$ , 300 MHz, ppm): 7.79 (d, 2 H,  $J = 8.4$  Hz), 7.23 (d, 2 H,  $J = 8.1$  Hz), 3.52-3.45 (m, 2 H), 3.33-3.29 (m, 2 H), 3.00-2.96 (m, 2 H), 2.38 (s, 3 H), 1.76-1.70 (m, 4 H), 1.15-1.09 (t, 3 H,  $J = 7.2$  Hz).  $^{13}\text{C}$  NMR ( $\text{CDCl}_3$ , 75 MHz, ppm):  $\delta = 165.0$ , 141.4, 128.9, 125.9, 48.0, 45.3, 28.3, 22.0, 21.2, 19.4, 11.2. IR (liquid film,  $\text{cm}^{-1}$ ):  $\nu = 2942$ , 2872, 1558, 1484, 1364, 1327, 1273, 1214, 1144, 1094, 1068, 984, 936, 825, 785, 753, 702, 672, 585, 555. HRMS calc.  $\text{C}_{14}\text{H}_{20}\text{N}_2\text{O}_2\text{S}$  ( $\text{M}^+$ ): 280.1245. Found: 280.1248.

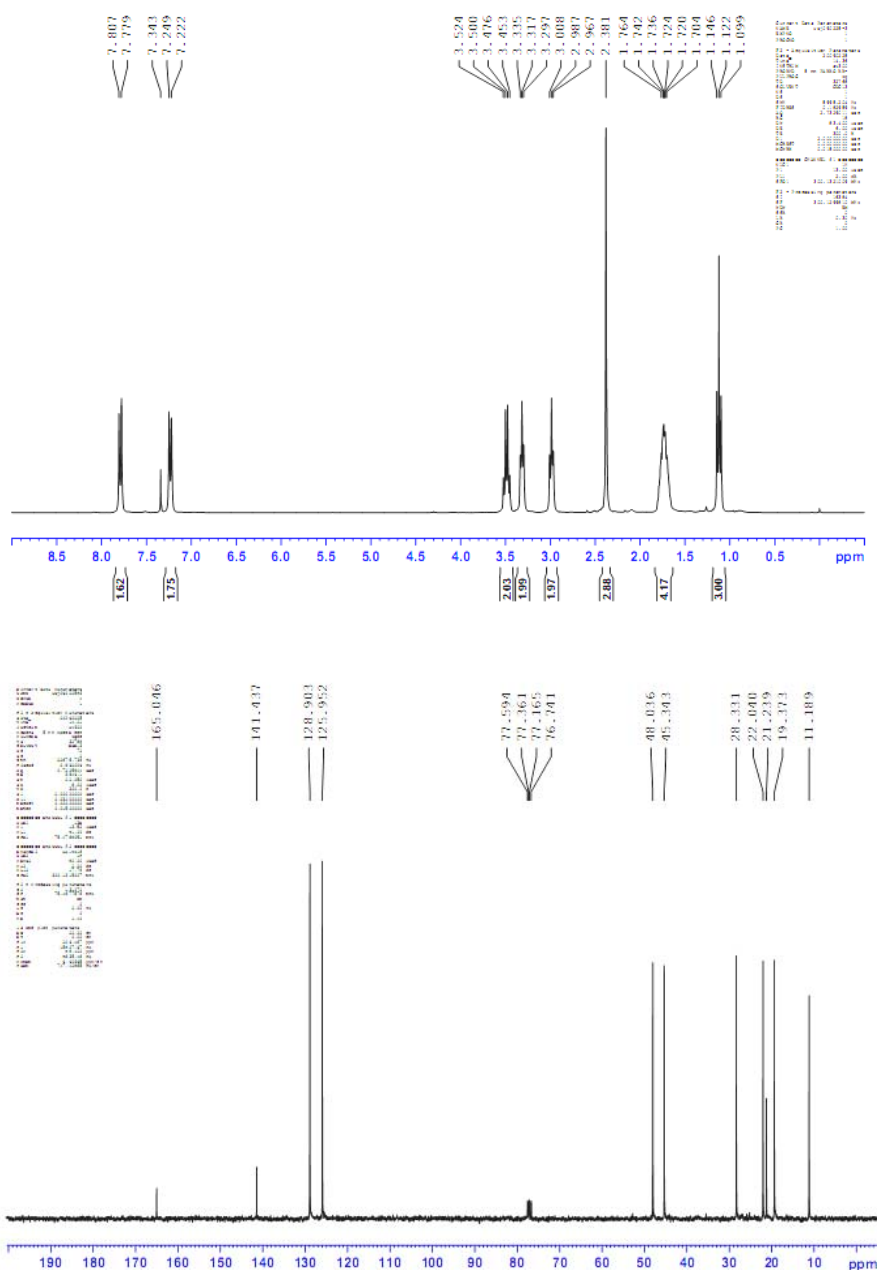

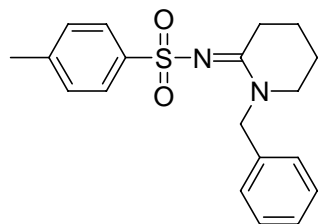

**N-(1-benzylpiperidin-2-ylidene)-4-methylbenzenesulfonamide**

$^1\text{H}$  NMR ( $\text{CDCl}_3$ , 300 MHz, ppm): 7.76 (d, 2 H,  $J = 7.8$  Hz), 7.29-7.18 (m, 7 H), 4.67 (s, 2 H), 3.26-3.10 (m, 4 H), 2.35 (s, 3 H), 1.71-1.69 (m, 4 H).  $^{13}\text{C}$  NMR ( $\text{CDCl}_3$ , 75 MHz, ppm):  $\delta = 166.0, 141.7, 141.4, 135.7, 129.1, 128.7, 128.1, 127.7, 126.2, 53.2, 48.3, 28.7, 22.1, 21.4, 19.5$ . IR (liquid film,  $\text{cm}^{-1}$ ):  $\nu = 2948, 2869, 1555, 1486, 1363, 1328, 1274, 1142, 1084, 964, 825, 701, 683, 584, 554$ . HRMS calc.  $\text{C}_{19}\text{H}_{22}\text{N}_2\text{O}_2\text{S}$  ( $\text{M}^+$ ): 342.1402. Found: 342.1403.

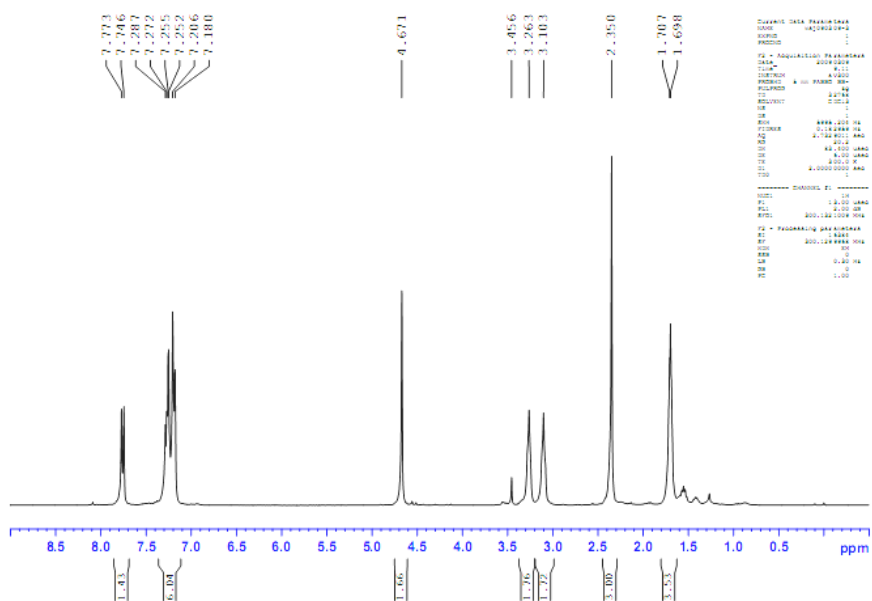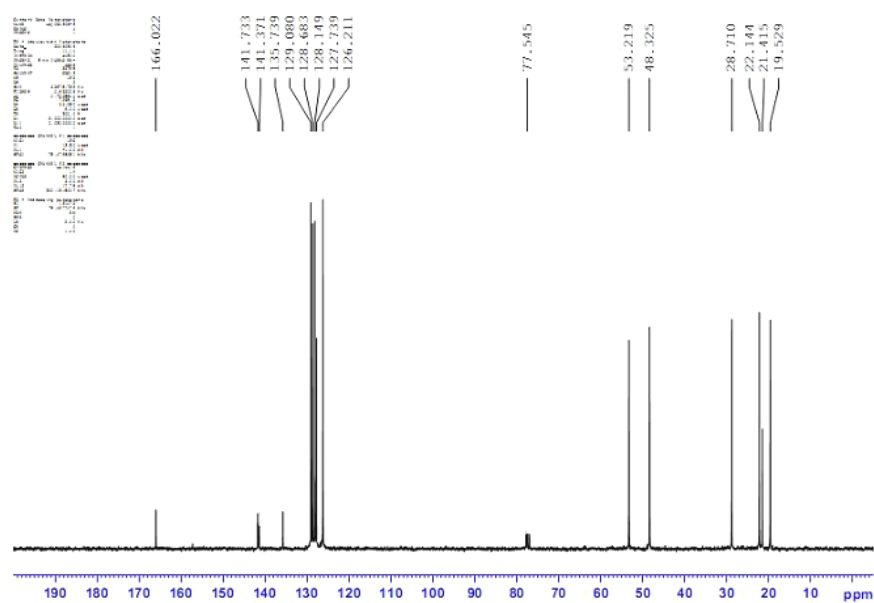

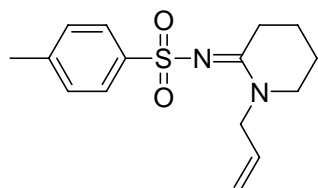

**N-(1-allylpiperidin-2-ylidene)-4-methylbenzenesulfonamide**

$^1\text{H}$  NMR ( $\text{CDCl}_3$ , 300 MHz, ppm): 7.80 (d, 2 H,  $J = 8.4$  Hz), 7.23 (d, 2 H,  $J = 7.8$  Hz), 5.80-5.69 (m, 1 H), 5.20-5.09 (m, 2 H), 4.08-4.05 (m, 2 H), 3.32-3.28 (m, 2 H), 3.09-3.05 (m, 2 H), 2.39 (s, 3 H), 1.82-1.71 (m, 4 H).  $^{13}\text{C}$  NMR ( $\text{CDCl}_3$ , 75 MHz, ppm):  $\delta = 165.7, 141.8, 141.5, 131.2, 129.1, 126.3, 118.6, 52.9, 48.2, 28.7, 22.3, 21.5, 19.7$ . IR (liquid film,  $\text{cm}^{-1}$ ):  $\nu = 2949, 2869, 1609, 1557, 1486, 1363, 1327, 1273, 1186, 1144, 1081, 966, 822, 696, 585, 555$ . HRMS calc.  $\text{C}_{15}\text{H}_{20}\text{N}_2\text{O}_2\text{S}$  ( $\text{M}^+$ ): 292.1245. Found: 292.1249.

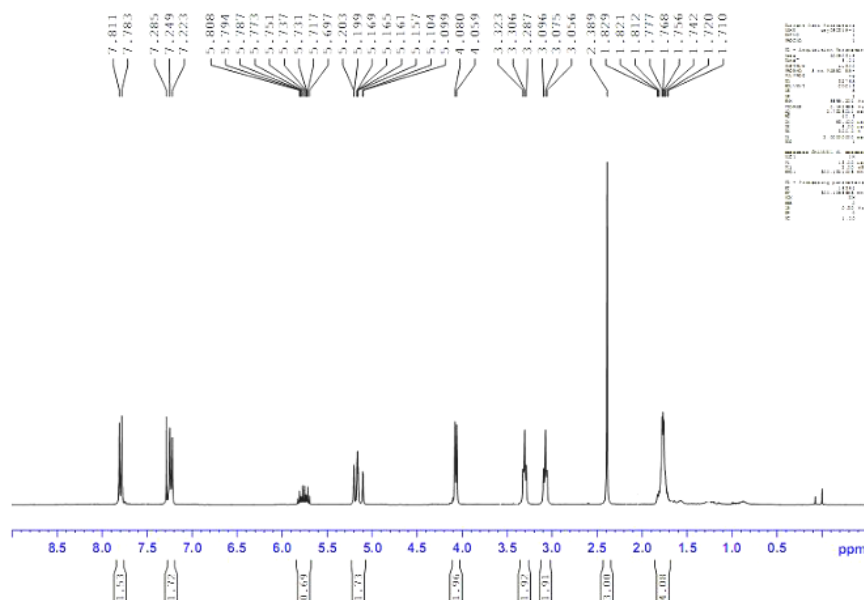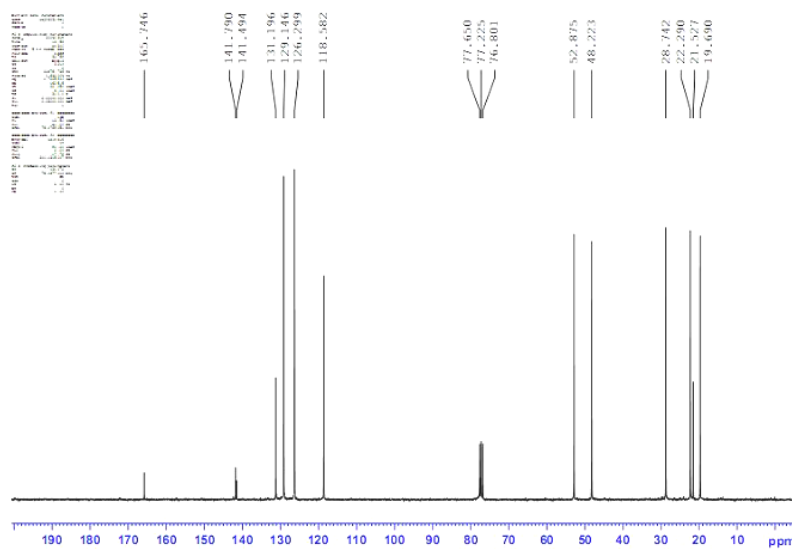

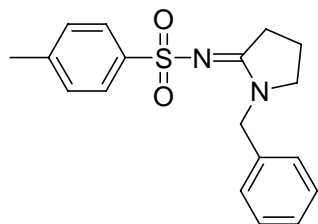

**N-(1-benzylpyrrolidin-2-ylidene)-4-methylbenzenesulfonamide**

$^1\text{H}$  NMR ( $\text{CDCl}_3$ , 300 MHz, ppm): 7.83 (d, 2 H,  $J = 7.8$  Hz), 7.30-7.19 (m, 7 H), 4.58 (s, 2 H), 3.36-3.31 (m, 2 H), 3.13-3.08 (m, 2 H), 2.40 (s, 3 H), 2.06-1.95 (m, 2 H).  $^{13}\text{C}$

NMR ( $\text{CDCl}_3$ , 75 MHz, ppm):  $\delta = 169.9, 142.1, 140.7, 135.1, 129.2, 128.9, 128.5, 128.1, 126.6, 48.9, 48.8, 31.1, 21.5, 19.1$ . IR (liquid film,  $\text{cm}^{-1}$ ):  $\nu = 2925, 1572, 1492, 1282, 1145, 1092, 909, 816, 703, 673, 589, 554$ . HRMS calc.  $\text{C}_{18}\text{H}_{20}\text{N}_2\text{O}_2\text{S}$  ( $\text{M}^+$ ): 328.1245. Found: 328.1241.

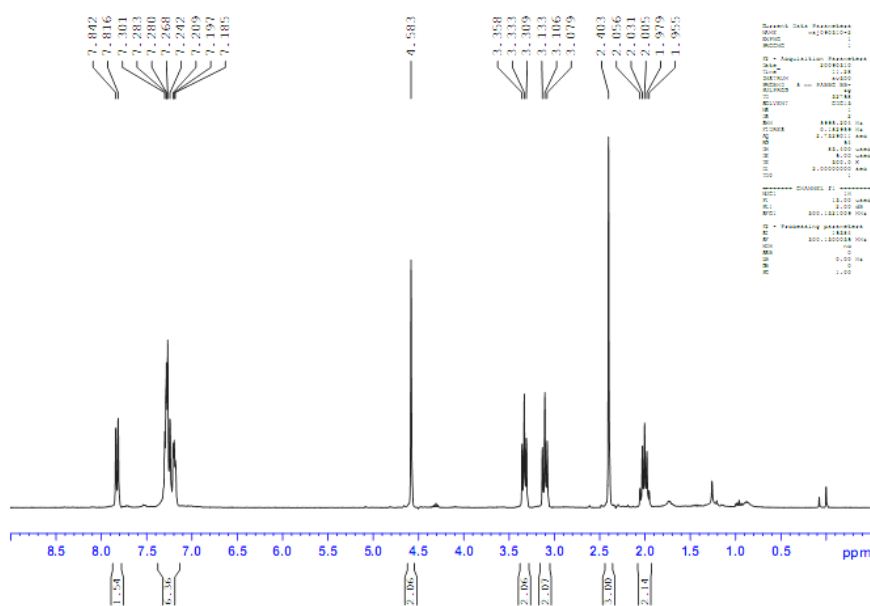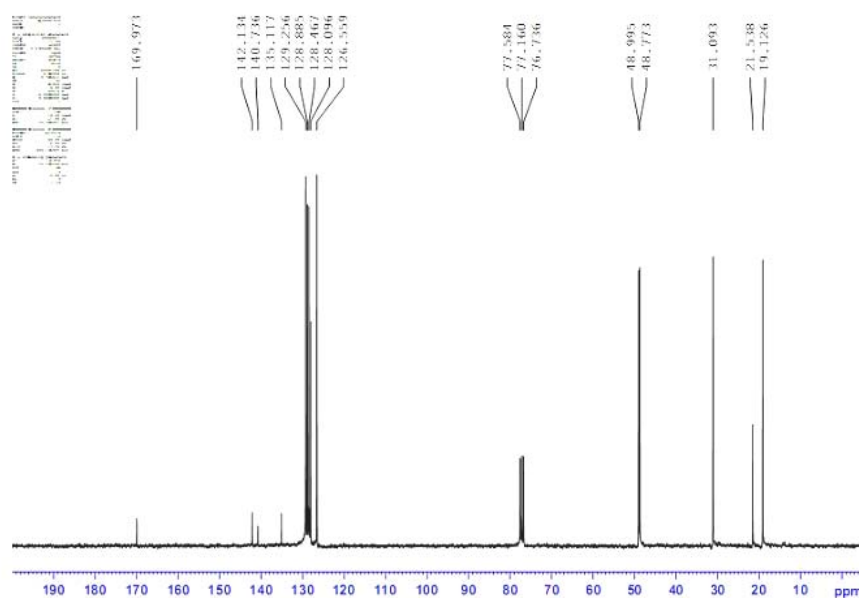



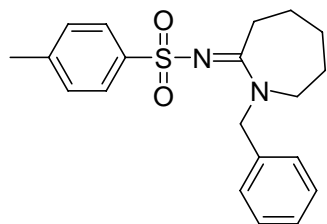

**N-(1-benzylazepan-2-ylidene)-4-methylbenzenesulfonamide**

$^1\text{H}$  NMR ( $\text{CDCl}_3$ , 300 MHz, ppm): 7.80 (d, 2 H,  $J = 8.1$  Hz), 7.28-7.20 (m, 7 H), 4.70 (s, 2 H), 3.44-3.41 (m, 2 H), 3.19-3.17 (m, 2 H), 2.38 (s, 3 H), 1.67-1.66 (m, 4 H), 1.45 (s, 2 H).  $^{13}\text{C}$  NMR ( $\text{CDCl}_3$ , 75 MHz, ppm):  $\delta = 171.4$ , 141.8, 141.6, 136.2, 129.2, 128.7, 128.4, 127.9, 126.3, 54.0, 50.5, 31.5, 29.2, 26.9, 23.1, 21.5. IR (liquid film,  $\text{cm}^{-1}$ ):  $\nu = 2932$ , 2861, 1546, 1494, 1453, 1355, 1323, 1264, 1207, 1182, 1148, 1085, 959, 892, 815, 779, 752, 688, 582, 556. HRMS calc.  $\text{C}_{20}\text{H}_{24}\text{N}_2\text{O}_2\text{S}$  ( $\text{M}^+$ ): 356.1558. Found: 356.1553.

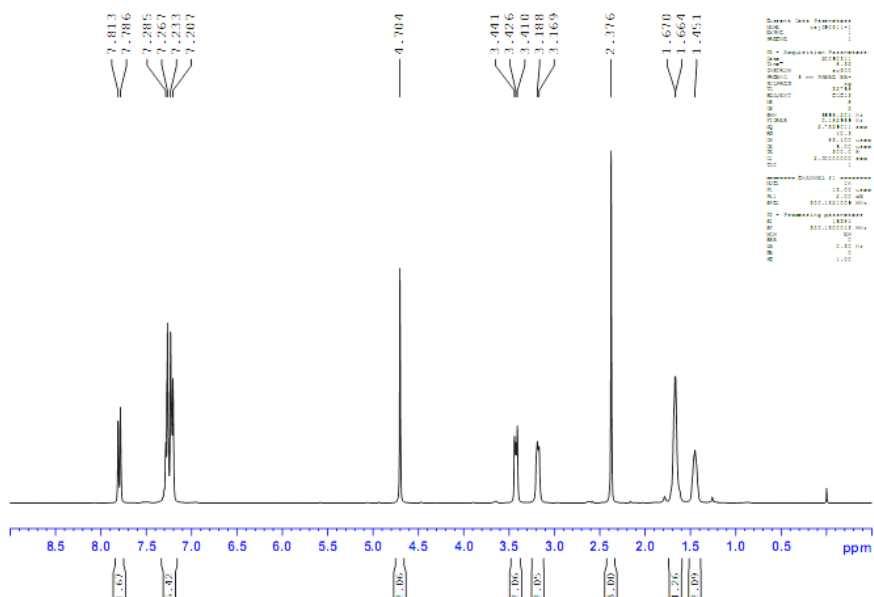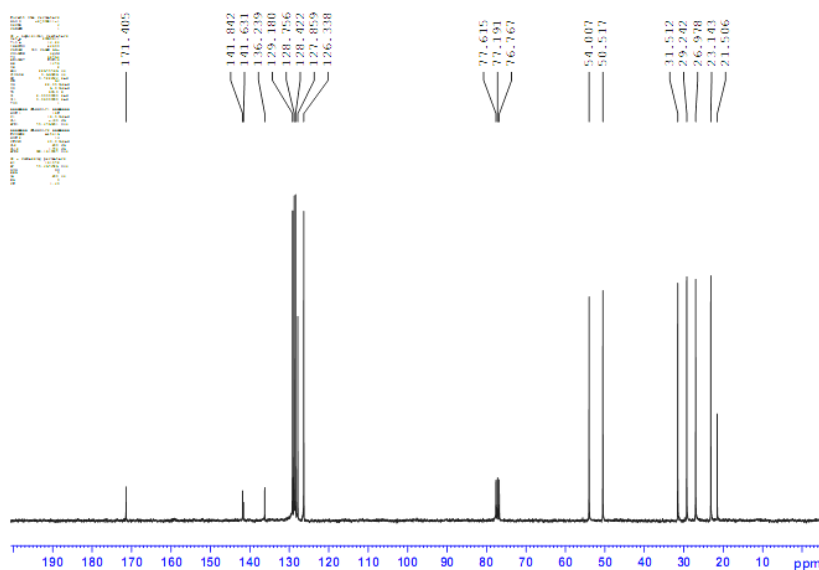

Supplement: b910009a.pdf [file b910009a.pdf]
