# Supplementary material for: Facile synthesis of sulfonyl amidines via carbon–nitrogen bond formation mediated by FeCl3
Source: Royal Society of Chemistry journal article supplement (doi:10.1039/b910009a), 2009-01-01
Supplement: controlexperiments.pdf [file controlexperiments.pdf]

A referee highlighted a recent report on the 'Role of metal contaminants in catalyses with FeCl<sub>3</sub>' (Buchwald and Bolm in *ACIEE*, 2009, 48, 5586). In order to investigate the influence of the impurities in the FeCl<sub>3</sub> on the reaction of sulfonyl azide with tertiary amine, we measured the contents of the metal impurities in the FeCl<sub>3</sub> that we used and several control experiments were carried out. The results were listed as below.

## Chemicals & instruments

FeCl<sub>3</sub> was purchased from Sinopharm Chemical Reagent Co. Ltd. (SCRC) with a purity of more than 97%. The ultrapure anhydrous FeCl<sub>3</sub> was purchased from Sigma-Aldrich (SA) with a purity of 99.99% (CAS Number: 7705-08-0; Product Number: 45164-9). The Inductive Coupled Plasma Optical Emission Spectrum (ICP-OES) was purchased from Thermo Electron Corporation and Atomic Absorption Spectrum (AAAnalyst 800) was purchased from Perkin Elmer. The detection of the impurities was performed on ICP-OES and AAAnalyst 800.

## The impurities in 97% FeCl<sub>3</sub>

The Inductive Coupled Plasma Optical Emission Spectrum (ICP-OES) and Atomic Absorption Spectrum (AAS) showed that the contents of metal impurities in 97% FeCl<sub>3</sub> are as below. Cu% = 0.015%; Al% = 0.0033%; Ca% = 0.0036%; Co% = 0.0007%; Cr% = 0.029%; Mg% = 0.0018%; Mn% = 0.054%; Ni% = 0.0028%; V% = 0.0004%; Pd% = 0.0016%.

## Control experiments

The reaction of TsN<sub>3</sub> with Et<sub>3</sub>N was selected as the model reaction to investigate the influence of metal impurities.

Experimental procedure: To a solution of TsN<sub>3</sub> (1.0 mmol) and Et<sub>3</sub>N (4.0 mmol) in 5.0 mL of CH<sub>2</sub>Cl<sub>2</sub> was added the corresponding mediator (the loading was listed in the table below), and the resulting mixture was reacted at room temperature monitored by TLC. Then the system was diluted with 10 mL CH<sub>2</sub>Cl<sub>2</sub>, following the addition of the EDTA-NaOH solution (20 mmol of EDTA and 20 mmol of NaOH in 15 mL of water). Afterwards, the whole mixture was refluxed for five hours and the organic layer was separated. The aqueous layer was extracted with CH<sub>2</sub>Cl<sub>2</sub> (10 mL×3)

and the combined organic phase was dried over anhydrous Na<sub>2</sub>SO<sub>4</sub> powder. The final product was obtained through purification with column chromatography. The corresponding results were listed in Table S1.

**Table S1 The reaction of TsN<sub>3</sub> with Et<sub>3</sub>N mediated by different metal source**

| Entr | Mediator                              | Source | Purity | Loading     | Isolated Yield (%) |
|------|---------------------------------------|--------|--------|-------------|--------------------|
| 1    | CuO                                   | SCRC   | 99%    | 100%        | 16                 |
| 2    | CuO                                   | SCRC   | 99%    | 20%         | trace              |
| 3    | CuO                                   | SCRC   | 99%    | 1%          | trace              |
| 4    | Cu <sub>2</sub> O                     | SCRC   | 90%    | 100%        | 13                 |
| 5    | CuCl                                  | SCRC   | 97%    | 100%        | 29                 |
| 6    | CuCl <sub>2</sub> <sup>a</sup>        | SCRC   | -      | 100%        | 64                 |
| 7    | CuCl <sub>2</sub>                     | SCRC   | -      | 75%         | 47                 |
| 8    | CuCl <sub>2</sub>                     | SCRC   | -      | 50%         | 32                 |
| 9    | CuCl <sub>2</sub>                     | SCRC   | -      | 20%         | 23                 |
| 10   | CuCl <sub>2</sub>                     | SCRC   | -      | 5%          | 9                  |
| 11   | CuCl <sub>2</sub> ·2H <sub>2</sub> O  | SCRC   | 99%    | 100%        | 8 <sup>b</sup>     |
| 12   | CuCl <sub>2</sub> / FeCl <sub>3</sub> | SCRC   | -      | 100% / 100% | 65                 |
| 13   | CuCl <sub>2</sub> / FeCl <sub>3</sub> | SCRC   | -      | 75% / 100%  | 67                 |
| 14   | CuCl <sub>2</sub> / FeCl <sub>3</sub> | SCRC   | -      | 50% / 100%  | 72                 |
| 15   | CuCl <sub>2</sub> / FeCl <sub>3</sub> | SCRC   | -      | 20% / 100%  | 77                 |
| 16   | CuCl <sub>2</sub> / FeCl <sub>3</sub> | SCRC   | -      | 10% / 100%  | 81                 |
| 17   | CuCl <sub>2</sub> / FeCl <sub>3</sub> | SCRC   | -      | 5% / 100%   | 87                 |
| 18   | Al <sub>2</sub> O <sub>3</sub>        | SCRC   | 99%    | 100%        | trace              |
| 19   | AlCl <sub>3</sub>                     | SCRC   | 99%    | 100%        | trace              |
| 20   | CaCl <sub>2</sub>                     | SCRC   | 96%    | 100%        | trace              |
| 21   | CaO                                   | SCRC   | 98%    | 100%        | trace              |
| 22   | CoCl <sub>2</sub> ·6H <sub>2</sub> O  | SCRC   | 99%    | 100%        | trace              |
| 23   | Co <sub>2</sub> O <sub>3</sub>        | SCRC   | 99%    | 100%        | trace              |
| 24   | Cr <sub>2</sub> O <sub>3</sub>        | SCRC   | 99%    | 100%        | trace              |
| 25   | CrO <sub>3</sub>                      | SCRC   | 99%    | 100%        | 28                 |
| 26   | CrCl <sub>3</sub> ·6H <sub>2</sub> O  | SCRC   | 99%    | 100%        | trace              |
| 27   | MgCl <sub>2</sub> ·6H <sub>2</sub> O  | SCRC   | 98%    | 100%        | trace              |
| 28   | MgO                                   | SCRC   | 98.5%  | 100%        | trace              |
| 29   | MnCl <sub>2</sub> ·4H <sub>2</sub> O  | SCRC   | 99%    | 100%        | trace              |

|    |                                      |            |        |      |                 |
|----|--------------------------------------|------------|--------|------|-----------------|
| 30 | MnO <sub>2</sub>                     | SCRC       | 97.5%  | 100% | trace           |
| 31 | NiCl <sub>2</sub> ·6H <sub>2</sub> O | SCRC       | 97%    | 100% | trace           |
| 32 | NiO                                  | SCRC       | 99%    | 100% | trace           |
| 33 | V <sub>2</sub> O <sub>5</sub>        | SCRC       | 99%    | 100% | trace           |
| 34 | PdCl <sub>2</sub>                    | Alfa Aesar | 99.9%  | 5%   | 7               |
| 35 | PdCl <sub>2</sub>                    | Alfa Aesar | 99.9%  | 10%  | 16              |
| 36 | PdCl <sub>2</sub>                    | Alfa Aesar | 99.9%  | 50%  | 39              |
| 37 | PdCl <sub>2</sub>                    | Alfa Aesar | 99.9%  | 100% | 56              |
| 38 | Pd(OAc) <sub>2</sub>                 | Acros      | -      | 5%   | 10 <sup>b</sup> |
| 39 | Pd(OAc) <sub>2</sub>                 | Acros      | -      | 10%  | 13 <sup>b</sup> |
| 40 | Pd(OAc) <sub>2</sub>                 | Acros      | -      | 50%  | 42 <sup>b</sup> |
| 41 | Pd(OAc) <sub>2</sub>                 | Acros      | -      | 100% | 78 <sup>b</sup> |
| 42 | FeCl <sub>3</sub>                    | SA         | 99.99% | 100% | 90 <sup>c</sup> |

<sup>a</sup> Anhydrous CuCl<sub>2</sub> was obtained by heating CuCl<sub>2</sub>·2H<sub>2</sub>O at 105 °C for 8 hours. <sup>b</sup> Reflux for six hours. <sup>c</sup> The average yield of three parallel reactions (88%, 90% and 91%).

## Results and discussion

The above results of control experiments strongly supported that it was FeCl<sub>3</sub> but metal impurities that mediate the reaction of sulfonyl azide with tertiaryamine. The ultrapure FeCl<sub>3</sub> could mediate the reaction with high yield (entry 42). This indicated that the FeCl<sub>3</sub> component in the 97% FeCl<sub>3</sub> played a predominant role in the mediation of the reaction. The metal impurities, such as Cu, Cr and Pd, could mediate the reaction to different extends depending on the mediator loading. As shown in Table S1, the anhydrous CuCl<sub>2</sub> could deliver a moderate yield of the product (entry 6) when stoichiometric CuCl<sub>2</sub> was used. And the yield of the product decreased notably with the reduction of the CuCl<sub>2</sub> loading (entries 7-10). When the amount of the CuCl<sub>2</sub> was less than 5%, TsN<sub>3</sub> almost remained unchanged with very low conversion. It suggested that the trace amounts of metal impurities in the 97% FeCl<sub>3</sub> had inessential influence on the mediating reactions. As a result, it is clear that FeCl<sub>3</sub> rather than minor impurities that mediates the reaction of sulfonyl azide with tertiaryamine under the reaction conditions.
